# Supplementary material for: Long non-coding RNA profiling in LPS-induced intestinal inflammation model: New insight into pathogenesis
Source: PubMed Central journal article supplement — Innate Immun. 2019 Aug 31;25(8):491–502. doi: 10.1177/1753425919872812 (PMC6900666; doi:10.1177/1753425919872812), 2019-08-31
Supplement: Supplemental_Material2.pdf [file Supplemental_Material2.pdf]

**Supplemental Table 1.** Primers for qPCR validation of lncRNAs.

| Gene        | Primer  | Sequence 5' → 3'        | T <sub>m</sub> (°C) | Product size (bp) |
|-------------|---------|-------------------------|---------------------|-------------------|
| MSTRG.28029 | Forward | GGAGAAGACCGAGAAGACGAA   | 60.0                | 121               |
|             | Reverse | CGAAGAATCCAACCGCTTAGAG  |                     |                   |
| MSTRG.50977 | Forward | GCTGTTCCCTTATGCCAGACCAT | 60.0                | 107               |
|             | Reverse | GCCTTCCATCCAACCTCCAGTC  |                     |                   |
| MSTRG.28586 | Forward | CTACACCACAGAAGCAGCAAGG  | 60.0                | 133               |
|             | Reverse | GACGAGTATCCAGGAGGACACA  |                     |                   |
| MSTRG.10517 | Forward | GCCAGTCTGTCACCACATCCT   | 60.0                | 106               |
|             | Reverse | ACCTGCCACATTCATCGTCTCA  |                     |                   |
| SIGLEC1     | Forward | AACCTGACCTGCCTTGTATGGA  | 60.0                | 150               |
|             | Reverse | CAATATGCCACAGCGGTAGGAG  |                     |                   |
| MSTRG.23436 | Forward | GGGCTACAGGACTAAGAAGGA   | 60.0                | 110               |
|             | Reverse | AGGACGGGGACAGGTGAT      |                     |                   |
| WWC3        | Forward | AATAGCAAGTCGCCGGGATAGG  | 60.0                | 156               |
|             | Reverse | TGCGCCTCGTCCAGTTTGTAGTT |                     |                   |
| MSTRG.533   | Forward | TTTGCCATGAATGCTAGTGC    | 60.0                | 169               |
|             | Reverse | TCTCCCTCCCTGCGTGTT      |                     |                   |
| MSTRG.8144  | Forward | AAGGCGGTGATGGAGACATTCA  | 60.0                | 125               |
|             | Reverse | GAGACTCAGCTAACAGGCAGGT  |                     |                   |
| SLA-8       | Forward | GCATCTGAATGCGTCTGTG     | 60.0                | 117               |
|             | Reverse | GCTCTGCCTCTGCTGGAA      |                     |                   |
| MSTRG.8674  | Forward | CCCCAAAGGGAGGTAACAGT    | 60.0                | 192               |
|             | Reverse | AGTATGCAGAAAGGGAACAGGA  |                     |                   |
| PDGFRA      | Forward | TGAAGGCCGTGGACATACTT    | 60.0                | 122               |
|             | Reverse | AGACAGCCTAAGACCAGCAG    |                     |                   |
| TMP-SLA-3   | Forward | TCACACCTTCCAGAGCATGT    | 60.0                | 83                |
|             | Reverse | CGTCGTAGCCAAACTGACTG    |                     |                   |
| TMP-SLA-5   | Forward | TTCTGGTCCTGGTCGCTGGA    | 60.0                | 100               |
|             | Reverse | CTGCCTGTAGCCTGAGTGTAGC  |                     |                   |

|        |         |                       |      |     |
|--------|---------|-----------------------|------|-----|
| ITGA10 | Forward | GACCTGGTAGATGTGGCTGT  | 60.0 | 89  |
|        | Reverse | ACATCCAGTGAAGGGTCCAG  |      |     |
| GAPDH  | Forward | CGTCCCTGAGACACGATGGT  | 60.0 | 194 |
|        | Reverse | GCCTTGACTGTGCCGTGGAAT |      |     |

---
