# Supplementary material for: Long non-coding RNA profiling in LPS-induced intestinal inflammation model: New insight into pathogenesis
Source: PubMed Central journal article supplement — Innate Immun. 2019 Aug 31;25(8):491–502. doi: 10.1177/1753425919872812 (PMC6900666; doi:10.1177/1753425919872812), 2019-08-31
Supplement: Supplemental_Material_1.pdf [file Supplemental_Material_1.pdf]

| LncRNA             | mRNA                | Distance |
|--------------------|---------------------|----------|
| ENSSSCG00000000651 | ENSSSCG00000000652  | 21862    |
| ENSSSCG00000001227 | ENSSSCG000000030731 | 37833    |
| ENSSSCG00000001228 | ENSSSCG00000001229  | 28373    |
| ENSSSCG00000001241 | ENSSSCG00000001239  | 19488    |
| ENSSSCG00000001248 | ENSSSCG000000025208 | 0        |
| ENSSSCG00000001389 | ENSSSCG00000001390  | 17903    |
| ENSSSCG00000001396 | ENSSSCG00000001401  | 0        |
| ENSSSCG00000001397 | ENSSSCG00000001229  | 20959    |
| ENSSSCG00000001727 | ENSSSCG00000001728  | 203498   |
| ENSSSCG00000003617 | ENSSSCG000000024845 | 10102    |
| ENSSSCG00000004334 | ENSSSCG00000004332  | 574775   |
| ENSSSCG00000004600 | ENSSSCG000000026445 | 232400   |
| ENSSSCG00000004943 | ENSSSCG000000023980 | 6318     |
| ENSSSCG00000005588 | ENSSSCG00000005589  | 45713    |
| ENSSSCG00000005968 | ENSSSCG000000021350 | 122454   |
| ENSSSCG00000006687 | ENSSSCG00000006686  | 7637     |
| ENSSSCG00000007146 | ENSSSCG00000007145  | 15422    |
| ENSSSCG00000007280 | ENSSSCG00000007279  | 24895    |
| ENSSSCG00000008496 | ENSSSCG000000025181 | 0        |
| ENSSSCG00000008841 | ENSSSCG000000028873 | 35473    |
| ENSSSCG00000010427 | ENSSSCG000000010428 | 481243   |
| ENSSSCG00000010709 | ENSSSCG000000010708 | 7355     |
| ENSSSCG00000011926 | ENSSSCG000000030856 | 69292    |
| ENSSSCG00000012108 | ENSSSCG000000022907 | 0        |
| ENSSSCG00000012298 | ENSSSCG000000012292 | 19109    |
| ENSSSCG00000012404 | ENSSSCG000000012402 | 48605    |
| ENSSSCG00000012614 | ENSSSCG000000023277 | 19388    |
| ENSSSCG00000012774 | ENSSSCG000000012773 | 15741    |
| ENSSSCG00000015375 | ENSSSCG000000024802 | 266160   |
| ENSSSCG00000015549 | ENSSSCG000000015551 | 32216    |
| ENSSSCG00000015579 | ENSSSCG000000015580 | 86131    |
| ENSSSCG00000015897 | ENSSSCG000000027472 | 67718    |
| ENSSSCG00000016341 | ENSSSCG000000016340 | 48757    |
| ENSSSCG00000017092 | ENSSSCG000000017091 | 47721    |
| ENSSSCG00000017640 | ENSSSCG000000017639 | 8899     |
| ENSSSCG00000017791 | ENSSSCG000000017793 | 74596    |
| ENSSSCG00000020977 | ENSSSCG000000012452 | 164706   |
| ENSSSCG00000021999 | ENSSSCG000000017930 | 27216    |
| ENSSSCG00000024809 | ENSSSCG000000012109 | 12680    |
| ENSSSCG00000025648 | ENSSSCG000000022907 | 226055   |
| ENSSSCG00000026838 | ENSSSCG00000005150  | 45994    |
| ENSSSCG00000026924 | ENSSSCG00000005902  | 1652     |
| ENSSSCG00000030574 | ENSSSCG000000022907 | 167233   |
| ENSSSCG00000030716 | ENSSSCG000000022501 | 809      |
| ENSSSCG00000030722 | ENSSSCG000000012095 | 167962   |
| ENSSSCG00000030724 | ENSSSCG000000010739 | 165125   |

|                    |                    |        |
|--------------------|--------------------|--------|
| ENSSSCG00000030729 | ENSSSCG00000011515 | 450209 |
| ENSSSCG00000030747 | ENSSSCG00000012109 | 207263 |
| ENSSSCG00000030749 | ENSSSCG00000012102 | 481403 |
| ENSSSCG00000030753 | ENSSSCG00000012289 | 5961   |
| ENSSSCG00000030754 | ENSSSCG00000006398 | 9213   |
| ENSSSCG00000030756 | ENSSSCG00000012102 | 440839 |
| ENSSSCG00000030758 | ENSSSCG00000027555 | 65973  |
| ENSSSCG00000030760 | ENSSSCG00000007470 | 27913  |
| ENSSSCG00000030761 | ENSSSCG00000012309 | 63944  |
| ENSSSCG00000030765 | ENSSSCG00000006084 | 366823 |
| ENSSSCG00000030767 | ENSSSCG00000001231 | 27477  |
| ENSSSCG00000030773 | ENSSSCG00000022833 | 32429  |
| ENSSSCG00000030777 | ENSSSCG00000001405 | 967    |
| ENSSSCG00000030780 | ENSSSCG00000012153 | 107723 |
| ENSSSCG00000030790 | ENSSSCG00000030731 | 23108  |
| ENSSSCG00000030804 | ENSSSCG00000006084 | 355659 |
| ENSSSCG00000030806 | ENSSSCG00000012629 | 10193  |
| ENSSSCG00000030808 | ENSSSCG00000007477 | 177833 |
| ENSSSCG00000030810 | ENSSSCG00000023450 | 7908   |
| ENSSSCG00000030812 | ENSSSCG00000012792 | 11755  |
| ENSSSCG00000030815 | ENSSSCG00000012104 | 245382 |
| ENSSSCG00000030816 | ENSSSCG00000012549 | 135331 |
| ENSSSCG00000030817 | ENSSSCG00000012546 | 53495  |
| ENSSSCG00000030822 | ENSSSCG00000007485 | 220092 |
| ENSSSCG00000030824 | ENSSSCG00000027701 | 67652  |
| ENSSSCG00000030826 | ENSSSCG00000022907 | 137373 |
| ENSSSCG00000030836 | ENSSSCG00000006084 | 374901 |
| ENSSSCG00000030844 | ENSSSCG00000012133 | 2472   |
| ENSSSCG00000030846 | ENSSSCG00000012327 | 62550  |
| ENSSSCG00000030847 | ENSSSCG00000006084 | 331672 |
| ENSSSCG00000030859 | ENSSSCG00000007477 | 174220 |
| ENSSSCG00000030860 | ENSSSCG00000029857 | 91074  |
| ENSSSCG00000030861 | ENSSSCG00000007485 | 232592 |
| ENSSSCG00000030871 | ENSSSCG00000021004 | 192871 |
| ENSSSCG00000030872 | ENSSSCG00000012241 | 215405 |
| ENSSSCG00000030883 | ENSSSCG00000030874 | 38151  |
| ENSSSCG00000030892 | ENSSSCG00000006084 | 300741 |
| ENSSSCG00000030894 | ENSSSCG00000012135 | 39656  |
| ENSSSCG00000030897 | ENSSSCG00000012685 | 53266  |
| ENSSSCG00000030899 | ENSSSCG00000020801 | 11118  |
| ENSSSCG00000030902 | ENSSSCG00000012662 | 136756 |
| ENSSSCG00000030904 | ENSSSCG00000005907 | 15735  |
| ENSSSCG00000030905 | ENSSSCG00000007481 | 112037 |
| ENSSSCG00000030915 | ENSSSCG00000007488 | 156007 |
| ENSSSCG00000030916 | ENSSSCG00000002396 | 12194  |
| ENSSSCG00000030918 | ENSSSCG00000030419 | 774    |
| ENSSSCG00000030919 | ENSSSCG00000012330 | 22142  |

|                    |                    |        |
|--------------------|--------------------|--------|
| ENSSSCG00000030923 | ENSSSCG00000001465 | 48056  |
| ENSSSCG00000030931 | ENSSSCG00000006084 | 381507 |
| ENSSSCG00000030934 | ENSSSCG00000012104 | 211111 |
| ENSSSCG00000030935 | ENSSSCG00000006084 | 340901 |
| ENSSSCG00000030936 | ENSSSCG00000012598 | 120156 |
| ENSSSCG00000030939 | ENSSSCG00000025028 | 57214  |
| ENSSSCG00000030940 | ENSSSCG00000012596 | 27081  |
| ENSSSCG00000030942 | ENSSSCG00000007495 | 38436  |
| ENSSSCG00000030945 | ENSSSCG00000007507 | 30348  |
| ENSSSCG00000030949 | ENSSSCG00000006084 | 370021 |
| ENSSSCG00000030950 | ENSSSCG00000012717 | 80336  |
| ENSSSCG00000030972 | ENSSSCG00000012606 | 53316  |
| ENSSSCG00000030973 | ENSSSCG00000030848 | 14160  |
| ENSSSCG00000030974 | ENSSSCG00000012731 | 344337 |
| ENSSSCG00000030975 | ENSSSCG00000030733 | 8547   |
| ENSSSCG00000030978 | ENSSSCG00000000657 | 57707  |
| ENSSSCG00000030987 | ENSSSCG00000007477 | 147491 |
| ENSSSCG00000030989 | ENSSSCG00000003626 | 33944  |
| ENSSSCG00000030991 | ENSSSCG00000016810 | 0      |
| ENSSSCG00000030992 | ENSSSCG00000006084 | 331273 |
| ENSSSCG00000030994 | ENSSSCG00000012241 | 163614 |
| ENSSSCG00000031004 | ENSSSCG00000012181 | 78044  |
| ENSSSCG00000031008 | ENSSSCG00000031027 | 1783   |
| ENSSSCG00000031009 | ENSSSCG00000005908 | 7731   |
| ENSSSCG00000031012 | ENSSSCG00000012380 | 12785  |
| ENSSSCG00000031014 | ENSSSCG00000011515 | 453363 |
| ENSSSCG00000031015 | ENSSSCG00000012462 | 425078 |
| ENSSSCG00000031017 | ENSSSCG00000024334 | 20735  |
| ENSSSCG00000031021 | ENSSSCG00000025447 | 117793 |
| ENSSSCG00000031024 | ENSSSCG00000007479 | 117550 |
| ENSSSCG00000031025 | ENSSSCG00000012100 | 36666  |
| ENSSSCG00000031026 | ENSSSCG00000015652 | 3822   |
| ENSSSCG00000031028 | ENSSSCG00000012251 | 54358  |
| ENSSSCG00000031038 | ENSSSCG00000012553 | 92686  |
| ENSSSCG00000031041 | ENSSSCG00000005943 | 73542  |
| ENSSSCG00000031048 | ENSSSCG00000017609 | 278637 |
| ENSSSCG00000031051 | ENSSSCG00000012101 | 539965 |
| ENSSSCG00000031056 | ENSSSCG00000021015 | 1043   |
| ENSSSCG00000031059 | ENSSSCG00000012633 | 148388 |
| ENSSSCG00000031066 | ENSSSCG00000012164 | 233255 |
| ENSSSCG00000031068 | ENSSSCG00000007499 | 35233  |
| ENSSSCG00000031070 | ENSSSCG00000022091 | 0      |
| MSTRG. 1007        | ENSSSCG00000004279 | 18059  |
| MSTRG. 1015        | ENSSSCG00000004279 | 115424 |
| MSTRG. 1020        | ENSSSCG00000004280 | 431906 |
| MSTRG. 10264       | ENSSSCG00000011280 | 0      |
| MSTRG. 10265       | ENSSSCG00000011282 | 19865  |

|              |                    |         |
|--------------|--------------------|---------|
| MSTRG. 10282 | ENSSSCG00000025739 | 164984  |
| MSTRG. 10312 | ENSSSCG00000011306 | 2345    |
| MSTRG. 10314 | ENSSSCG00000011307 | 4064    |
| MSTRG. 10328 | ENSSSCG00000011302 | 22371   |
| MSTRG. 10333 | ENSSSCG00000011298 | 58536   |
| MSTRG. 10417 | ENSSSCG00000011347 | 3997    |
| MSTRG. 105   | ENSSSCG00000004058 | 17273   |
| MSTRG. 10502 | ENSSSCG00000025791 | 18346   |
| MSTRG. 10611 | ENSSSCG00000011457 | 11432   |
| MSTRG. 10679 | ENSSSCG00000011471 | 153988  |
| MSTRG. 10765 | ENSSSCG00000025202 | 8940    |
| MSTRG. 10800 | ENSSSCG00000011498 | 435779  |
| MSTRG. 10832 | ENSSSCG00000011515 | 38103   |
| MSTRG. 10837 | ENSSSCG00000011515 | 137562  |
| MSTRG. 10868 | ENSSSCG00000011515 | 268476  |
| MSTRG. 10940 | ENSSSCG00000011516 | 253933  |
| MSTRG. 10941 | ENSSSCG00000011516 | 232899  |
| MSTRG. 1097  | ENSSSCG00000004291 | 47464   |
| MSTRG. 11007 | ENSSSCG00000025053 | 153218  |
| MSTRG. 11101 | ENSSSCG00000030273 | 28842   |
| MSTRG. 11117 | ENSSSCG00000011545 | 4696    |
| MSTRG. 11133 | ENSSSCG00000011557 | 3663    |
| MSTRG. 11164 | ENSSSCG00000011577 | 32437   |
| MSTRG. 11165 | ENSSSCG00000011577 | 32527   |
| MSTRG. 11224 | ENSSSCG00000024453 | 20267   |
| MSTRG. 11302 | ENSSSCG00000011612 | 45894   |
| MSTRG. 11310 | ENSSSCG00000011613 | 656     |
| MSTRG. 11321 | ENSSSCG00000011621 | 14253   |
| MSTRG. 11342 | ENSSSCG00000023929 | 51782   |
| MSTRG. 11364 | ENSSSCG00000011637 | 12842   |
| MSTRG. 11405 | ENSSSCG00000011643 | 16191   |
| MSTRG. 11603 | ENSSSCG00000011670 | 36576   |
| MSTRG. 11607 | ENSSSCG00000022073 | 42372   |
| MSTRG. 11608 | ENSSSCG00000022073 | 7523    |
| MSTRG. 11615 | ENSSSCG00000011673 | 57206   |
| MSTRG. 11665 | ENSSSCG00000011676 | 29974   |
| MSTRG. 11672 | ENSSSCG00000011677 | 98856   |
| MSTRG. 11742 | ENSSSCG00000011680 | 117324  |
| MSTRG. 1175  | ENSSSCG00000004314 | 47998   |
| MSTRG. 11839 | ENSSSCG00000028477 | 1659    |
| MSTRG. 11862 | ENSSSCG00000011715 | 26390   |
| MSTRG. 11892 | ENSSSCG00000011720 | 145239  |
| MSTRG. 12040 | ENSSSCG00000021430 | 76649   |
| MSTRG. 1208  | ENSSSCG00000004330 | 80830   |
| MSTRG. 12083 | ENSSSCG00000029080 | 1490259 |
| MSTRG. 12086 | ENSSSCG00000021108 | 23901   |
| MSTRG. 12087 | ENSSSCG00000021108 | 42216   |

|              |                    |         |
|--------------|--------------------|---------|
| MSTRG. 1209  | ENSSSCG00000004332 | 379018  |
| MSTRG. 12092 | ENSSSCG00000021503 | 60541   |
| MSTRG. 1211  | ENSSSCG00000004332 | 1190504 |
| MSTRG. 12434 | ENSSSCG00000011772 | 55547   |
| MSTRG. 12495 | ENSSSCG00000011775 | 86796   |
| MSTRG. 12496 | ENSSSCG00000011775 | 37978   |
| MSTRG. 12547 | ENSSSCG00000021581 | 17215   |
| MSTRG. 126   | ENSSSCG00000023471 | 29636   |
| MSTRG. 1261  | ENSSSCG00000004350 | 25790   |
| MSTRG. 12643 | ENSSSCG00000011804 | 115059  |
| MSTRG. 12655 | ENSSSCG00000011810 | 244527  |
| MSTRG. 12668 | ENSSSCG00000028430 | 257886  |
| MSTRG. 12723 | ENSSSCG00000026362 | 12224   |
| MSTRG. 12752 | ENSSSCG00000027209 | 39459   |
| MSTRG. 12766 | ENSSSCG00000024109 | 112727  |
| MSTRG. 12818 | ENSSSCG00000011847 | 6691    |
| MSTRG. 12826 | ENSSSCG00000011848 | 28876   |
| MSTRG. 12939 | ENSSSCG00000024904 | 22604   |
| MSTRG. 12959 | ENSSSCG00000024904 | 57892   |
| MSTRG. 12982 | ENSSSCG00000011874 | 53599   |
| MSTRG. 12984 | ENSSSCG00000011875 | 33919   |
| MSTRG. 13132 | ENSSSCG00000011910 | 220259  |
| MSTRG. 13133 | ENSSSCG00000011910 | 225037  |
| MSTRG. 13155 | ENSSSCG00000011910 | 462531  |
| MSTRG. 13295 | ENSSSCG00000027820 | 45026   |
| MSTRG. 13300 | ENSSSCG00000021511 | 20307   |
| MSTRG. 13359 | ENSSSCG00000027275 | 56363   |
| MSTRG. 13408 | ENSSSCG00000011946 | 257212  |
| MSTRG. 1345  | ENSSSCG00000004369 | 163553  |
| MSTRG. 13465 | ENSSSCG00000011962 | 12065   |
| MSTRG. 13475 | ENSSSCG00000011960 | 39721   |
| MSTRG. 1349  | ENSSSCG00000004369 | 144094  |
| MSTRG. 13495 | ENSSSCG00000028390 | 7803    |
| MSTRG. 13553 | ENSSSCG00000011973 | 71512   |
| MSTRG. 13560 | ENSSSCG00000011973 | 32001   |
| MSTRG. 13666 | ENSSSCG00000012021 | 62996   |
| MSTRG. 13706 | ENSSSCG00000021355 | 9444    |
| MSTRG. 13710 | ENSSSCG00000021023 | 58308   |
| MSTRG. 1373  | ENSSSCG00000004380 | 17931   |
| MSTRG. 13753 | ENSSSCG00000012051 | 231908  |
| MSTRG. 13804 | ENSSSCG00000030480 | 148371  |
| MSTRG. 13836 | ENSSSCG00000012071 | 41189   |
| MSTRG. 13896 | ENSSSCG00000025525 | 9414    |
| MSTRG. 13912 | ENSSSCG00000021296 | 13450   |
| MSTRG. 13981 | ENSSSCG00000009612 | 4430    |
| MSTRG. 14099 | ENSSSCG00000009682 | 191916  |
| MSTRG. 14143 | ENSSSCG00000021805 | 15508   |

|              |                    |        |
|--------------|--------------------|--------|
| MSTRG. 14144 | ENSSSCG00000009706 | 84374  |
| MSTRG. 14153 | ENSSSCG00000029331 | 30053  |
| MSTRG. 14163 | ENSSSCG00000009731 | 5834   |
| MSTRG. 14190 | ENSSSCG00000009754 | 711433 |
| MSTRG. 14216 | ENSSSCG00000009759 | 202827 |
| MSTRG. 14220 | ENSSSCG00000009763 | 28994  |
| MSTRG. 14264 | ENSSSCG00000009779 | 99174  |
| MSTRG. 14272 | ENSSSCG00000009792 | 22011  |
| MSTRG. 14293 | ENSSSCG00000023342 | 14246  |
| MSTRG. 14307 | ENSSSCG00000009807 | 28952  |
| MSTRG. 14327 | ENSSSCG00000025001 | 83408  |
| MSTRG. 14334 | ENSSSCG00000030222 | 28114  |
| MSTRG. 14336 | ENSSSCG00000030222 | 26205  |
| MSTRG. 14375 | ENSSSCG00000009840 | 21477  |
| MSTRG. 14388 | ENSSSCG00000009854 | 95393  |
| MSTRG. 14483 | ENSSSCG00000009890 | 34072  |
| MSTRG. 14513 | ENSSSCG00000020716 | 14781  |
| MSTRG. 14532 | ENSSSCG00000009919 | 63511  |
| MSTRG. 14534 | ENSSSCG00000009919 | 20602  |
| MSTRG. 14594 | ENSSSCG00000009967 | 64462  |
| MSTRG. 1466  | ENSSSCG00000004399 | 67542  |
| MSTRG. 14664 | ENSSSCG00000030996 | 906    |
| MSTRG. 14677 | ENSSSCG00000009977 | 17171  |
| MSTRG. 14691 | ENSSSCG00000010002 | 30421  |
| MSTRG. 14760 | ENSSSCG00000010042 | 73597  |
| MSTRG. 14762 | ENSSSCG00000010042 | 87366  |
| MSTRG. 14764 | ENSSSCG00000010042 | 92747  |
| MSTRG. 14779 | ENSSSCG00000010048 | 59813  |
| MSTRG. 14801 | ENSSSCG00000010069 | 1988   |
| MSTRG. 14814 | ENSSSCG00000030379 | 0      |
| MSTRG. 14840 | ENSSSCG00000010098 | 3186   |
| MSTRG. 14863 | ENSSSCG00000010116 | 4868   |
| MSTRG. 14964 | ENSSSCG00000021444 | 225768 |
| MSTRG. 1503  | ENSSSCG00000004395 | 18978  |
| MSTRG. 15033 | ENSSSCG00000010148 | 22901  |
| MSTRG. 15095 | ENSSSCG00000010155 | 36545  |
| MSTRG. 15175 | ENSSSCG00000010186 | 132722 |
| MSTRG. 15191 | ENSSSCG00000023241 | 40291  |
| MSTRG. 15212 | ENSSSCG00000010203 | 40130  |
| MSTRG. 15414 | ENSSSCG00000027658 | 42890  |
| MSTRG. 15455 | ENSSSCG00000010290 | 104454 |
| MSTRG. 15456 | ENSSSCG00000010290 | 176657 |
| MSTRG. 15458 | ENSSSCG00000010291 | 22823  |
| MSTRG. 15483 | ENSSSCG00000010301 | 53632  |
| MSTRG. 15518 | ENSSSCG00000010322 | 10492  |
| MSTRG. 15631 | ENSSSCG00000010341 | 52136  |
| MSTRG. 1573  | ENSSSCG00000004417 | 19349  |

|              |                    |        |
|--------------|--------------------|--------|
| MSTRG. 15755 | ENSSSCG00000010411 | 52014  |
| MSTRG. 15765 | ENSSSCG00000029576 | 22189  |
| MSTRG. 15789 | ENSSSCG00000010435 | 176190 |
| MSTRG. 15791 | ENSSSCG00000010435 | 253908 |
| MSTRG. 15830 | ENSSSCG00000010457 | 82448  |
| MSTRG. 15854 | ENSSSCG00000010465 | 64750  |
| MSTRG. 15925 | ENSSSCG00000010491 | 4174   |
| MSTRG. 15934 | ENSSSCG00000010503 | 5425   |
| MSTRG. 15953 | ENSSSCG00000010511 | 63475  |
| MSTRG. 1599  | ENSSSCG00000004421 | 255312 |
| MSTRG. 16026 | ENSSSCG00000010541 | 18946  |
| MSTRG. 1604  | ENSSSCG00000004425 | 152138 |
| MSTRG. 16098 | ENSSSCG00000010585 | 67219  |
| MSTRG. 16107 | ENSSSCG00000026424 | 11169  |
| MSTRG. 16113 | ENSSSCG00000010592 | 36624  |
| MSTRG. 16163 | ENSSSCG00000010624 | 50075  |
| MSTRG. 16222 | ENSSSCG00000010638 | 200580 |
| MSTRG. 16232 | ENSSSCG00000010652 | 83782  |
| MSTRG. 16323 | ENSSSCG00000010708 | 3798   |
| MSTRG. 16342 | ENSSSCG00000029482 | 64777  |
| MSTRG. 16349 | ENSSSCG00000010735 | 112405 |
| MSTRG. 16350 | ENSSSCG00000023560 | 18172  |
| MSTRG. 16364 | ENSSSCG00000010739 | 177823 |
| MSTRG. 16373 | ENSSSCG00000010743 | 20885  |
| MSTRG. 16429 | ENSSSCG00000010756 | 489109 |
| MSTRG. 16430 | ENSSSCG00000010756 | 280580 |
| MSTRG. 16435 | ENSSSCG00000010759 | 88674  |
| MSTRG. 16449 | ENSSSCG00000010775 | 13572  |
| MSTRG. 16456 | ENSSSCG00000010779 | 9080   |
| MSTRG. 16542 | ENSSSCG00000021343 | 109757 |
| MSTRG. 16546 | ENSSSCG00000023628 | 166924 |
| MSTRG. 16710 | ENSSSCG00000015688 | 174801 |
| MSTRG. 16775 | ENSSSCG00000015697 | 42800  |
| MSTRG. 16847 | ENSSSCG00000015710 | 61248  |
| MSTRG. 16866 | ENSSSCG00000023693 | 39705  |
| MSTRG. 16932 | ENSSSCG00000021516 | 23050  |
| MSTRG. 16949 | ENSSSCG00000015754 | 114047 |
| MSTRG. 17001 | ENSSSCG00000015783 | 18548  |
| MSTRG. 17002 | ENSSSCG00000015783 | 15862  |
| MSTRG. 17056 | ENSSSCG00000015797 | 41847  |
| MSTRG. 17196 | ENSSSCG00000027345 | 83820  |
| MSTRG. 17220 | ENSSSCG00000015863 | 314316 |
| MSTRG. 17228 | ENSSSCG00000015871 | 17213  |
| MSTRG. 17234 | ENSSSCG00000029753 | 25394  |
| MSTRG. 17248 | ENSSSCG00000015879 | 124673 |
| MSTRG. 1727  | ENSSSCG00000028780 | 43103  |
| MSTRG. 17282 | ENSSSCG00000015883 | 51400  |

|              |                    |        |
|--------------|--------------------|--------|
| MSTRG. 17283 | ENSSSCG00000015884 | 39549  |
| MSTRG. 17395 | ENSSSCG00000029506 | 207602 |
| MSTRG. 17506 | ENSSSCG00000015947 | 39825  |
| MSTRG. 17510 | ENSSSCG00000025049 | 47776  |
| MSTRG. 17512 | ENSSSCG00000025049 | 60810  |
| MSTRG. 17546 | ENSSSCG00000021446 | 164469 |
| MSTRG. 17550 | ENSSSCG00000015961 | 118609 |
| MSTRG. 17556 | ENSSSCG00000015962 | 56028  |
| MSTRG. 17568 | ENSSSCG00000015962 | 81037  |
| MSTRG. 17621 | ENSSSCG00000016000 | 22175  |
| MSTRG. 17626 | ENSSSCG00000016000 | 33347  |
| MSTRG. 17692 | ENSSSCG00000025134 | 103541 |
| MSTRG. 17776 | ENSSSCG00000016062 | 7375   |
| MSTRG. 17779 | ENSSSCG00000016062 | 10037  |
| MSTRG. 17792 | ENSSSCG00000021044 | 77393  |
| MSTRG. 17827 | ENSSSCG00000023076 | 120630 |
| MSTRG. 17882 | ENSSSCG00000016086 | 10667  |
| MSTRG. 17904 | ENSSSCG00000016095 | 8209   |
| MSTRG. 17936 | ENSSSCG00000025774 | 25394  |
| MSTRG. 17942 | ENSSSCG00000024826 | 35623  |
| MSTRG. 17981 | ENSSSCG00000030081 | 41282  |
| MSTRG. 18131 | ENSSSCG00000016140 | 0      |
| MSTRG. 18233 | ENSSSCG00000016184 | 5234   |
| MSTRG. 18256 | ENSSSCG00000016199 | 3915   |
| MSTRG. 18273 | ENSSSCG00000016210 | 8291   |
| MSTRG. 18327 | ENSSSCG00000016225 | 36749  |
| MSTRG. 18328 | ENSSSCG00000016225 | 35687  |
| MSTRG. 18337 | ENSSSCG00000016225 | 72336  |
| MSTRG. 18345 | ENSSSCG00000016225 | 100490 |
| MSTRG. 18362 | ENSSSCG00000025174 | 46168  |
| MSTRG. 18385 | ENSSSCG00000016237 | 231009 |
| MSTRG. 18391 | ENSSSCG00000016243 | 197774 |
| MSTRG. 18406 | ENSSSCG00000016244 | 146139 |
| MSTRG. 18424 | ENSSSCG00000016248 | 50632  |
| MSTRG. 18436 | ENSSSCG00000016248 | 29386  |
| MSTRG. 18441 | ENSSSCG00000021968 | 50099  |
| MSTRG. 18457 | ENSSSCG00000016263 | 37018  |
| MSTRG. 18459 | ENSSSCG00000016265 | 15742  |
| MSTRG. 18460 | ENSSSCG00000016265 | 51937  |
| MSTRG. 18462 | ENSSSCG00000016265 | 22284  |
| MSTRG. 18466 | ENSSSCG00000016265 | 33984  |
| MSTRG. 18483 | ENSSSCG00000016278 | 13015  |
| MSTRG. 18484 | ENSSSCG00000016278 | 36128  |
| MSTRG. 18500 | ENSSSCG00000025325 | 0      |
| MSTRG. 18504 | ENSSSCG00000016286 | 0      |
| MSTRG. 18505 | ENSSSCG00000016286 | 0      |
| MSTRG. 18512 | ENSSSCG00000016289 | 77233  |

|              |                    |        |
|--------------|--------------------|--------|
| MSTRG. 18514 | ENSSSCG00000016291 | 0      |
| MSTRG. 18527 | ENSSSCG00000016297 | 27803  |
| MSTRG. 1855  | ENSSSCG00000004515 | 0      |
| MSTRG. 18572 | ENSSSCG00000016328 | 9268   |
| MSTRG. 18585 | ENSSSCG00000016342 | 9442   |
| MSTRG. 18588 | ENSSSCG00000016342 | 2143   |
| MSTRG. 1863  | ENSSSCG00000004518 | 77967  |
| MSTRG. 18630 | ENSSSCG00000028180 | 8253   |
| MSTRG. 18644 | ENSSSCG00000016380 | 5199   |
| MSTRG. 18649 | ENSSSCG00000016379 | 26078  |
| MSTRG. 18666 | ENSSSCG00000016399 | 27183  |
| MSTRG. 18683 | ENSSSCG00000024462 | 81938  |
| MSTRG. 18728 | ENSSSCG00000016794 | 139999 |
| MSTRG. 18840 | ENSSSCG00000016830 | 245728 |
| MSTRG. 18841 | ENSSSCG00000016830 | 247114 |
| MSTRG. 18846 | ENSSSCG00000016832 | 12193  |
| MSTRG. 18903 | ENSSSCG00000024079 | 48441  |
| MSTRG. 18904 | ENSSSCG00000016861 | 56519  |
| MSTRG. 18924 | ENSSSCG00000024922 | 37709  |
| MSTRG. 18927 | ENSSSCG00000016868 | 21092  |
| MSTRG. 18928 | ENSSSCG00000016868 | 18578  |
| MSTRG. 18929 | ENSSSCG00000016868 | 5072   |
| MSTRG. 18933 | ENSSSCG00000016868 | 2472   |
| MSTRG. 18934 | ENSSSCG00000024680 | 10346  |
| MSTRG. 18954 | ENSSSCG00000030304 | 3524   |
| MSTRG. 18968 | ENSSSCG00000016877 | 50696  |
| MSTRG. 1898  | ENSSSCG00000004528 | 118514 |
| MSTRG. 18999 | ENSSSCG00000024947 | 0      |
| MSTRG. 19019 | ENSSSCG00000016893 | 170450 |
| MSTRG. 1911  | ENSSSCG00000004534 | 92609  |
| MSTRG. 19140 | ENSSSCG00000029695 | 136197 |
| MSTRG. 19150 | ENSSSCG00000029695 | 188648 |
| MSTRG. 19304 | ENSSSCG00000025194 | 205440 |
| MSTRG. 19470 | ENSSSCG00000021154 | 55304  |
| MSTRG. 19497 | ENSSSCG00000016981 | 0      |
| MSTRG. 19500 | ENSSSCG00000016981 | 72154  |
| MSTRG. 19501 | ENSSSCG00000016981 | 70733  |
| MSTRG. 19502 | ENSSSCG00000016981 | 63264  |
| MSTRG. 19509 | ENSSSCG00000016982 | 8705   |
| MSTRG. 19533 | ENSSSCG00000016989 | 49709  |
| MSTRG. 19538 | ENSSSCG00000016991 | 3199   |
| MSTRG. 19558 | ENSSSCG00000022478 | 7246   |
| MSTRG. 19664 | ENSSSCG00000017015 | 169221 |
| MSTRG. 19741 | ENSSSCG00000017042 | 51281  |
| MSTRG. 19822 | ENSSSCG00000017079 | 17487  |
| MSTRG. 19832 | ENSSSCG00000017090 | 12876  |
| MSTRG. 19844 | ENSSSCG00000017095 | 432690 |

|              |                    |        |
|--------------|--------------------|--------|
| MSTRG. 19867 | ENSSSCG00000017107 | 10397  |
| MSTRG. 19890 | ENSSSCG00000017123 | 71350  |
| MSTRG. 19975 | ENSSSCG00000007001 | 0      |
| MSTRG. 20028 | ENSSSCG00000007029 | 0      |
| MSTRG. 20060 | ENSSSCG00000026893 | 12715  |
| MSTRG. 20064 | ENSSSCG00000026466 | 35066  |
| MSTRG. 20074 | ENSSSCG00000025844 | 8021   |
| MSTRG. 20075 | ENSSSCG00000025844 | 56914  |
| MSTRG. 2008  | ENSSSCG00000004565 | 31325  |
| MSTRG. 20088 | ENSSSCG00000007045 | 166470 |
| MSTRG. 2009  | ENSSSCG00000004565 | 46036  |
| MSTRG. 20114 | ENSSSCG00000007046 | 12734  |
| MSTRG. 20125 | ENSSSCG00000007049 | 11173  |
| MSTRG. 20126 | ENSSSCG00000026090 | 54801  |
| MSTRG. 20200 | ENSSSCG00000007089 | 13995  |
| MSTRG. 20332 | ENSSSCG00000007164 | 1978   |
| MSTRG. 20350 | ENSSSCG00000007178 | 12925  |
| MSTRG. 20361 | ENSSSCG00000028461 | 8195   |
| MSTRG. 20369 | ENSSSCG00000007189 | 21983  |
| MSTRG. 20394 | ENSSSCG00000007227 | 24434  |
| MSTRG. 20395 | ENSSSCG00000007227 | 37801  |
| MSTRG. 20396 | ENSSSCG00000007227 | 48636  |
| MSTRG. 20429 | ENSSSCG00000007251 | 9973   |
| MSTRG. 20454 | ENSSSCG00000007265 | 72896  |
| MSTRG. 20480 | ENSSSCG00000021769 | 28032  |
| MSTRG. 20485 | ENSSSCG00000030702 | 11163  |
| MSTRG. 20514 | ENSSSCG00000007285 | 23971  |
| MSTRG. 20515 | ENSSSCG00000007285 | 33973  |
| MSTRG. 20523 | ENSSSCG00000007287 | 30236  |
| MSTRG. 20561 | ENSSSCG00000007313 | 54192  |
| MSTRG. 20626 | ENSSSCG00000007336 | 6401   |
| MSTRG. 20734 | ENSSSCG00000025757 | 8316   |
| MSTRG. 20741 | ENSSSCG00000007370 | 28483  |
| MSTRG. 20816 | ENSSSCG00000023306 | 16540  |
| MSTRG. 20932 | ENSSSCG00000007469 | 56507  |
| MSTRG. 20947 | ENSSSCG00000007477 | 147459 |
| MSTRG. 20948 | ENSSSCG00000007477 | 131810 |
| MSTRG. 20951 | ENSSSCG00000007478 | 136827 |
| MSTRG. 20967 | ENSSSCG00000007485 | 242123 |
| MSTRG. 20970 | ENSSSCG00000007485 | 228780 |
| MSTRG. 20971 | ENSSSCG00000007485 | 227649 |
| MSTRG. 20976 | ENSSSCG00000007487 | 10995  |
| MSTRG. 2099  | ENSSSCG00000004586 | 102547 |
| MSTRG. 21020 | ENSSSCG00000007520 | 114033 |
| MSTRG. 21032 | ENSSSCG00000007531 | 2400   |
| MSTRG. 21064 | ENSSSCG00000016408 | 51040  |
| MSTRG. 21123 | ENSSSCG00000016431 | 67804  |

|              |                    |        |
|--------------|--------------------|--------|
| MSTRG. 21124 | ENSSSCG00000016431 | 91590  |
| MSTRG. 21138 | ENSSSCG00000016438 | 27929  |
| MSTRG. 21141 | ENSSSCG00000016436 | 5538   |
| MSTRG. 21161 | ENSSSCG00000016444 | 20742  |
| MSTRG. 21209 | ENSSSCG00000029612 | 79797  |
| MSTRG. 21242 | ENSSSCG00000016499 | 14082  |
| MSTRG. 21252 | ENSSSCG00000029586 | 44043  |
| MSTRG. 21254 | ENSSSCG00000016502 | 51795  |
| MSTRG. 21263 | ENSSSCG00000025850 | 85284  |
| MSTRG. 21275 | ENSSSCG00000016506 | 59123  |
| MSTRG. 21398 | ENSSSCG00000016539 | 97318  |
| MSTRG. 21454 | ENSSSCG00000016551 | 272572 |
| MSTRG. 21460 | ENSSSCG00000016551 | 225648 |
| MSTRG. 21468 | ENSSSCG00000016551 | 198816 |
| MSTRG. 21501 | ENSSSCG00000016564 | 59845  |
| MSTRG. 2153  | ENSSSCG00000026445 | 65362  |
| MSTRG. 21537 | ENSSSCG00000016577 | 3303   |
| MSTRG. 21565 | ENSSSCG00000028200 | 66335  |
| MSTRG. 21566 | ENSSSCG00000028200 | 67959  |
| MSTRG. 21611 | ENSSSCG00000021652 | 0      |
| MSTRG. 21728 | ENSSSCG00000016640 | 123523 |
| MSTRG. 21894 | ENSSSCG00000016655 | 142131 |
| MSTRG. 21901 | ENSSSCG00000016655 | 177787 |
| MSTRG. 21913 | ENSSSCG00000016655 | 272473 |
| MSTRG. 21935 | ENSSSCG00000016661 | 130886 |
| MSTRG. 21974 | ENSSSCG00000016665 | 269152 |
| MSTRG. 21992 | ENSSSCG00000022912 | 41967  |
| MSTRG. 22039 | ENSSSCG00000016684 | 39882  |
| MSTRG. 22086 | ENSSSCG00000016707 | 1760   |
| MSTRG. 22096 | ENSSSCG00000016708 | 127297 |
| MSTRG. 22113 | ENSSSCG00000016715 | 77911  |
| MSTRG. 22137 | ENSSSCG00000016720 | 18548  |
| MSTRG. 22169 | ENSSSCG00000016731 | 0      |
| MSTRG. 22206 | ENSSSCG00000016752 | 0      |
| MSTRG. 22216 | ENSSSCG00000016757 | 12244  |
| MSTRG. 22323 | ENSSSCG00000012858 | 0      |
| MSTRG. 22329 | ENSSSCG00000030888 | 26286  |
| MSTRG. 22348 | ENSSSCG00000029328 | 28302  |
| MSTRG. 22367 | ENSSSCG00000012885 | 55495  |
| MSTRG. 22370 | ENSSSCG00000012885 | 40918  |
| MSTRG. 22384 | ENSSSCG00000026349 | 9471   |
| MSTRG. 22409 | ENSSSCG00000012916 | 6422   |
| MSTRG. 22411 | ENSSSCG00000027956 | 11513  |
| MSTRG. 22430 | ENSSSCG00000022726 | 45082  |
| MSTRG. 22457 | ENSSSCG00000012957 | 16565  |
| MSTRG. 22458 | ENSSSCG00000012956 | 71240  |
| MSTRG. 22494 | ENSSSCG00000012986 | 12575  |

|              |                    |        |
|--------------|--------------------|--------|
| MSTRG. 22498 | ENSSSCG00000020737 | 19425  |
| MSTRG. 22499 | ENSSSCG00000012992 | 30642  |
| MSTRG. 22532 | ENSSSCG00000023178 | 11794  |
| MSTRG. 22552 | ENSSSCG00000013030 | 5534   |
| MSTRG. 22610 | ENSSSCG00000021431 | 4746   |
| MSTRG. 22613 | ENSSSCG00000025351 | 4420   |
| MSTRG. 22633 | ENSSSCG00000024803 | 13271  |
| MSTRG. 22642 | ENSSSCG00000013072 | 30808  |
| MSTRG. 22673 | ENSSSCG00000013094 | 26992  |
| MSTRG. 22674 | ENSSSCG00000013094 | 29859  |
| MSTRG. 22678 | ENSSSCG00000013115 | 30875  |
| MSTRG. 22690 | ENSSSCG00000022114 | 0      |
| MSTRG. 22702 | ENSSSCG00000013116 | 4055   |
| MSTRG. 22758 | ENSSSCG00000027481 | 78622  |
| MSTRG. 22781 | ENSSSCG00000013225 | 7304   |
| MSTRG. 22788 | ENSSSCG00000022487 | 14395  |
| MSTRG. 22791 | ENSSSCG00000022487 | 5695   |
| MSTRG. 22822 | ENSSSCG00000013258 | 11963  |
| MSTRG. 22839 | ENSSSCG00000025647 | 43670  |
| MSTRG. 22861 | ENSSSCG00000013276 | 45575  |
| MSTRG. 22877 | ENSSSCG00000029521 | 113592 |
| MSTRG. 22885 | ENSSSCG00000025731 | 37409  |
| MSTRG. 22917 | ENSSSCG00000013300 | 49583  |
| MSTRG. 22936 | ENSSSCG00000013305 | 95944  |
| MSTRG. 22946 | ENSSSCG00000030563 | 51158  |
| MSTRG. 23170 | ENSSSCG00000013390 | 112959 |
| MSTRG. 23196 | ENSSSCG00000021317 | 24990  |
| MSTRG. 23204 | ENSSSCG00000021170 | 72034  |
| MSTRG. 23247 | ENSSSCG00000013397 | 95904  |
| MSTRG. 23291 | ENSSSCG00000020731 | 12361  |
| MSTRG. 2341  | ENSSSCG00000004653 | 30057  |
| MSTRG. 23410 | ENSSSCG00000013928 | 6812   |
| MSTRG. 23412 | ENSSSCG00000013927 | 28134  |
| MSTRG. 23425 | ENSSSCG00000013911 | 22617  |
| MSTRG. 23436 | ENSSSCG00000013901 | 6427   |
| MSTRG. 23438 | ENSSSCG00000013901 | 2981   |
| MSTRG. 23479 | ENSSSCG00000013858 | 38873  |
| MSTRG. 23546 | ENSSSCG00000013779 | 39605  |
| MSTRG. 23564 | ENSSSCG00000013765 | 17994  |
| MSTRG. 23595 | ENSSSCG00000013743 | 5062   |
| MSTRG. 23648 | ENSSSCG00000013666 | 7731   |
| MSTRG. 2369  | ENSSSCG00000004665 | 38725  |
| MSTRG. 23744 | ENSSSCG00000013593 | 23619  |
| MSTRG. 23787 | ENSSSCG00000013552 | 5057   |
| MSTRG. 23801 | ENSSSCG00000024275 | 0      |
| MSTRG. 23807 | ENSSSCG00000020891 | 6484   |
| MSTRG. 23846 | ENSSSCG00000013517 | 66646  |

|              |                    |        |
|--------------|--------------------|--------|
| MSTRG. 2395  | ENSSSCG00000004673 | 37448  |
| MSTRG. 24017 | ENSSSCG00000013421 | 18763  |
| MSTRG. 24079 | ENSSSCG00000014022 | 33252  |
| MSTRG. 24148 | ENSSSCG00000014056 | 7744   |
| MSTRG. 24187 | ENSSSCG00000014067 | 21490  |
| MSTRG. 24191 | ENSSSCG00000014067 | 3812   |
| MSTRG. 24202 | ENSSSCG00000024586 | 94225  |
| MSTRG. 24252 | ENSSSCG00000014096 | 0      |
| MSTRG. 24254 | ENSSSCG00000014096 | 77393  |
| MSTRG. 24261 | ENSSSCG00000014101 | 188796 |
| MSTRG. 24319 | ENSSSCG00000014113 | 166324 |
| MSTRG. 24579 | ENSSSCG00000014171 | 46867  |
| MSTRG. 246   | ENSSSCG00000004071 | 133081 |
| MSTRG. 24617 | ENSSSCG00000014180 | 91568  |
| MSTRG. 24742 | ENSSSCG00000014199 | 134649 |
| MSTRG. 24773 | ENSSSCG00000014202 | 15354  |
| MSTRG. 2478  | ENSSSCG00000004709 | 17342  |
| MSTRG. 24794 | ENSSSCG00000014207 | 40010  |
| MSTRG. 24896 | ENSSSCG00000014224 | 111333 |
| MSTRG. 24925 | ENSSSCG00000027857 | 150036 |
| MSTRG. 2495  | ENSSSCG00000004716 | 87132  |
| MSTRG. 25038 | ENSSSCG00000014252 | 72953  |
| MSTRG. 25047 | ENSSSCG00000014255 | 96806  |
| MSTRG. 25071 | ENSSSCG00000014268 | 29626  |
| MSTRG. 25137 | ENSSSCG00000020915 | 31596  |
| MSTRG. 25141 | ENSSSCG00000014276 | 14666  |
| MSTRG. 25142 | ENSSSCG00000014276 | 27603  |
| MSTRG. 25145 | ENSSSCG00000014277 | 26110  |
| MSTRG. 25212 | ENSSSCG00000014303 | 40112  |
| MSTRG. 25214 | ENSSSCG00000014305 | 29100  |
| MSTRG. 25243 | ENSSSCG00000014316 | 50066  |
| MSTRG. 25276 | ENSSSCG00000023647 | 22596  |
| MSTRG. 25287 | ENSSSCG00000014328 | 29238  |
| MSTRG. 25294 | ENSSSCG00000014336 | 19441  |
| MSTRG. 25299 | ENSSSCG00000014338 | 14918  |
| MSTRG. 25301 | ENSSSCG00000014338 | 17005  |
| MSTRG. 25356 | ENSSSCG00000014357 | 46363  |
| MSTRG. 25367 | ENSSSCG00000021989 | 965    |
| MSTRG. 25376 | ENSSSCG00000014363 | 2125   |
| MSTRG. 25412 | ENSSSCG00000028382 | 14249  |
| MSTRG. 25433 | ENSSSCG00000014400 | 134590 |
| MSTRG. 25435 | ENSSSCG00000014400 | 225467 |
| MSTRG. 25446 | ENSSSCG00000014401 | 728591 |
| MSTRG. 25476 | ENSSSCG00000014415 | 56486  |
| MSTRG. 25523 | ENSSSCG00000014439 | 6315   |
| MSTRG. 25539 | ENSSSCG00000014447 | 15437  |
| MSTRG. 25542 | ENSSSCG00000014539 | 4214   |

|              |                    |        |
|--------------|--------------------|--------|
| MSTRG. 25571 | ENSSSCG00000020813 | 22985  |
| MSTRG. 25594 | ENSSSCG00000007549 | 5221   |
| MSTRG. 25624 | ENSSSCG00000007564 | 34778  |
| MSTRG. 25632 | ENSSSCG00000007569 | 0      |
| MSTRG. 25644 | ENSSSCG00000007576 | 58187  |
| MSTRG. 25645 | ENSSSCG00000007577 | 20015  |
| MSTRG. 25677 | ENSSSCG00000024245 | 9913   |
| MSTRG. 25685 | ENSSSCG00000007599 | 44079  |
| MSTRG. 25692 | ENSSSCG00000007601 | 125200 |
| MSTRG. 25693 | ENSSSCG00000007603 | 88475  |
| MSTRG. 25722 | ENSSSCG00000007609 | 28384  |
| MSTRG. 25773 | ENSSSCG00000007665 | 1593   |
| MSTRG. 25777 | ENSSSCG00000025096 | 664    |
| MSTRG. 25792 | ENSSSCG00000007681 | 160661 |
| MSTRG. 25793 | ENSSSCG00000007681 | 281529 |
| MSTRG. 25810 | ENSSSCG00000023912 | 26846  |
| MSTRG. 25850 | ENSSSCG00000021536 | 92     |
| MSTRG. 25867 | ENSSSCG00000007720 | 90285  |
| MSTRG. 25869 | ENSSSCG00000007721 | 85932  |
| MSTRG. 25876 | ENSSSCG00000007722 | 43564  |
| MSTRG. 25927 | ENSSSCG00000007749 | 21632  |
| MSTRG. 2599  | ENSSSCG00000004748 | 0      |
| MSTRG. 25998 | ENSSSCG00000007796 | 3986   |
| MSTRG. 26044 | ENSSSCG00000007818 | 0      |
| MSTRG. 26047 | ENSSSCG00000007818 | 67298  |
| MSTRG. 26056 | ENSSSCG00000026077 | 25142  |
| MSTRG. 26063 | ENSSSCG00000026077 | 102218 |
| MSTRG. 26151 | ENSSSCG00000007849 | 18622  |
| MSTRG. 26156 | ENSSSCG00000021955 | 7849   |
| MSTRG. 26193 | ENSSSCG00000007872 | 236339 |
| MSTRG. 26194 | ENSSSCG00000007872 | 225050 |
| MSTRG. 2620  | ENSSSCG00000004769 | 6508   |
| MSTRG. 26205 | ENSSSCG00000026966 | 0      |
| MSTRG. 26208 | ENSSSCG00000026966 | 698    |
| MSTRG. 26218 | ENSSSCG00000026266 | 67233  |
| MSTRG. 26243 | ENSSSCG00000007888 | 2448   |
| MSTRG. 26250 | ENSSSCG00000007897 | 7339   |
| MSTRG. 26264 | ENSSSCG00000024321 | 48184  |
| MSTRG. 26286 | ENSSSCG00000020675 | 166413 |
| MSTRG. 26332 | ENSSSCG00000007941 | 9152   |
| MSTRG. 26344 | ENSSSCG00000007947 | 74481  |
| MSTRG. 26359 | ENSSSCG00000007956 | 15699  |
| MSTRG. 26368 | ENSSSCG00000029285 | 1832   |
| MSTRG. 26371 | ENSSSCG00000026262 | 0      |
| MSTRG. 26392 | ENSSSCG00000029641 | 19175  |
| MSTRG. 26445 | ENSSSCG00000008009 | 33348  |
| MSTRG. 26450 | ENSSSCG00000008009 | 14200  |

|              |                    |        |
|--------------|--------------------|--------|
| MSTRG. 26455 | ENSSSCG00000008012 | 3779   |
| MSTRG. 26514 | ENSSSCG00000008057 | 19389  |
| MSTRG. 26522 | ENSSSCG00000008068 | 50911  |
| MSTRG. 26534 | ENSSSCG00000030143 | 8430   |
| MSTRG. 26537 | ENSSSCG00000030143 | 8951   |
| MSTRG. 2659  | ENSSSCG00000027069 | 3752   |
| MSTRG. 26604 | ENSSSCG00000008075 | 57206  |
| MSTRG. 26606 | ENSSSCG00000008075 | 73252  |
| MSTRG. 26627 | ENSSSCG00000028103 | 15693  |
| MSTRG. 26629 | ENSSSCG00000025899 | 78990  |
| MSTRG. 26630 | ENSSSCG00000008079 | 90521  |
| MSTRG. 26633 | ENSSSCG00000008080 | 90153  |
| MSTRG. 26642 | ENSSSCG00000008080 | 37135  |
| MSTRG. 26661 | ENSSSCG00000008084 | 14211  |
| MSTRG. 26679 | ENSSSCG00000008098 | 34505  |
| MSTRG. 267   | ENSSSCG00000004080 | 42432  |
| MSTRG. 26704 | ENSSSCG00000008107 | 9041   |
| MSTRG. 26705 | ENSSSCG00000008107 | 71187  |
| MSTRG. 26706 | ENSSSCG00000008107 | 220509 |
| MSTRG. 26708 | ENSSSCG00000008107 | 380647 |
| MSTRG. 26720 | ENSSSCG00000008108 | 22762  |
| MSTRG. 2674  | ENSSSCG00000004793 | 108398 |
| MSTRG. 26744 | ENSSSCG00000008114 | 19868  |
| MSTRG. 26755 | ENSSSCG00000008127 | 20621  |
| MSTRG. 26789 | ENSSSCG00000008144 | 36258  |
| MSTRG. 26794 | ENSSSCG00000008144 | 35525  |
| MSTRG. 26796 | ENSSSCG00000008147 | 30283  |
| MSTRG. 26810 | ENSSSCG00000028020 | 53313  |
| MSTRG. 26826 | ENSSSCG00000023550 | 17753  |
| MSTRG. 26870 | ENSSSCG00000022565 | 109689 |
| MSTRG. 26902 | ENSSSCG00000008185 | 14552  |
| MSTRG. 26911 | ENSSSCG00000008188 | 69927  |
| MSTRG. 26913 | ENSSSCG00000025010 | 8340   |
| MSTRG. 26921 | ENSSSCG00000022954 | 39153  |
| MSTRG. 2693  | ENSSSCG00000004802 | 54622  |
| MSTRG. 26933 | ENSSSCG00000008200 | 87982  |
| MSTRG. 26937 | ENSSSCG00000008200 | 4634   |
| MSTRG. 26942 | ENSSSCG00000008195 | 2173   |
| MSTRG. 26953 | ENSSSCG00000020750 | 0      |
| MSTRG. 26954 | ENSSSCG00000023617 | 7235   |
| MSTRG. 26955 | ENSSSCG00000020750 | 30665  |
| MSTRG. 26996 | ENSSSCG00000008218 | 49647  |
| MSTRG. 27015 | ENSSSCG00000008226 | 82217  |
| MSTRG. 27051 | ENSSSCG00000008240 | 15666  |
| MSTRG. 27103 | ENSSSCG00000021287 | 18518  |
| MSTRG. 27111 | ENSSSCG00000021546 | 31259  |
| MSTRG. 27282 | ENSSSCG00000022708 | 36243  |

|              |                    |        |
|--------------|--------------------|--------|
| MSTRG. 27304 | ENSSSCG00000023409 | 7454   |
| MSTRG. 27312 | ENSSSCG00000008332 | 29426  |
| MSTRG. 27316 | ENSSSCG00000027224 | 1665   |
| MSTRG. 27322 | ENSSSCG00000008334 | 25038  |
| MSTRG. 27324 | ENSSSCG00000008334 | 13731  |
| MSTRG. 27331 | ENSSSCG00000008336 | 65436  |
| MSTRG. 27333 | ENSSSCG00000008337 | 159116 |
| MSTRG. 27383 | ENSSSCG00000008357 | 73085  |
| MSTRG. 2746  | ENSSSCG00000004822 | 21318  |
| MSTRG. 27463 | ENSSSCG00000008368 | 39807  |
| MSTRG. 27468 | ENSSSCG00000008369 | 110420 |
| MSTRG. 27523 | ENSSSCG00000008378 | 40098  |
| MSTRG. 27529 | ENSSSCG00000008384 | 13847  |
| MSTRG. 27569 | ENSSSCG00000008392 | 82916  |
| MSTRG. 27598 | ENSSSCG00000008399 | 1357   |
| MSTRG. 27619 | ENSSSCG00000022357 | 19855  |
| MSTRG. 27624 | ENSSSCG00000022357 | 2876   |
| MSTRG. 2773  | ENSSSCG00000026006 | 86278  |
| MSTRG. 27731 | ENSSSCG00000020931 | 83919  |
| MSTRG. 27781 | ENSSSCG00000008441 | 19448  |
| MSTRG. 27798 | ENSSSCG00000008444 | 216299 |
| MSTRG. 27904 | ENSSSCG00000008461 | 51294  |
| MSTRG. 2791  | ENSSSCG00000004858 | 154747 |
| MSTRG. 2799  | ENSSSCG00000022768 | 102318 |
| MSTRG. 28029 | ENSSSCG00000008478 | 133383 |
| MSTRG. 28066 | ENSSSCG00000008487 | 60315  |
| MSTRG. 28247 | ENSSSCG00000008539 | 16662  |
| MSTRG. 28260 | ENSSSCG00000008542 | 145464 |
| MSTRG. 28354 | ENSSSCG00000029413 | 17269  |
| MSTRG. 28356 | ENSSSCG00000029413 | 17113  |
| MSTRG. 28366 | ENSSSCG00000008581 | 253919 |
| MSTRG. 28419 | ENSSSCG00000008593 | 393031 |
| MSTRG. 28473 | ENSSSCG00000008624 | 367201 |
| MSTRG. 285   | ENSSSCG00000004090 | 45936  |
| MSTRG. 28522 | ENSSSCG00000008640 | 21663  |
| MSTRG. 28525 | ENSSSCG00000020799 | 34891  |
| MSTRG. 28526 | ENSSSCG00000008638 | 0      |
| MSTRG. 28530 | ENSSSCG00000023539 | 0      |
| MSTRG. 28541 | ENSSSCG00000008645 | 59841  |
| MSTRG. 28543 | ENSSSCG00000008646 | 96673  |
| MSTRG. 28546 | ENSSSCG00000008647 | 0      |
| MSTRG. 28547 | ENSSSCG00000008648 | 30924  |
| MSTRG. 28551 | ENSSSCG00000008647 | 106066 |
| MSTRG. 28552 | ENSSSCG00000008647 | 107125 |
| MSTRG. 28559 | ENSSSCG00000028650 | 6099   |
| MSTRG. 28586 | ENSSSCG00000008662 | 15423  |
| MSTRG. 28587 | ENSSSCG00000007071 | 129079 |

|              |                     |        |
|--------------|---------------------|--------|
| MSTRG. 28589 | ENSSSSCG00000008662 | 51619  |
| MSTRG. 28592 | ENSSSSCG00000007071 | 0      |
| MSTRG. 28593 | ENSSSSCG00000028849 | 42279  |
| MSTRG. 28594 | ENSSSSCG00000028849 | 37782  |
| MSTRG. 28597 | ENSSSSCG00000028849 | 497    |
| MSTRG. 28599 | ENSSSSCG00000007071 | 330    |
| MSTRG. 28617 | ENSSSSCG00000005890 | 10529  |
| MSTRG. 28681 | ENSSSSCG00000006958 | 37101  |
| MSTRG. 287   | ENSSSSCG00000004090 | 38706  |
| MSTRG. 28706 | ENSSSSCG00000005933 | 22452  |
| MSTRG. 28707 | ENSSSSCG00000005933 | 18007  |
| MSTRG. 28725 | ENSSSSCG00000030947 | 301592 |
| MSTRG. 28752 | ENSSSSCG00000005943 | 73692  |
| MSTRG. 28776 | ENSSSSCG00000005956 | 38039  |
| MSTRG. 28777 | ENSSSSCG00000028759 | 246488 |
| MSTRG. 28794 | ENSSSSCG00000028759 | 67985  |
| MSTRG. 28814 | ENSSSSCG00000028759 | 30458  |
| MSTRG. 28815 | ENSSSSCG00000028759 | 81988  |
| MSTRG. 28818 | ENSSSSCG00000005965 | 725075 |
| MSTRG. 28825 | ENSSSSCG00000005965 | 52152  |
| MSTRG. 28842 | ENSSSSCG00000021350 | 107477 |
| MSTRG. 28859 | ENSSSSCG00000005971 | 69738  |
| MSTRG. 28908 | ENSSSSCG00000005979 | 51848  |
| MSTRG. 2891  | ENSSSSCG00000004878 | 4965   |
| MSTRG. 28913 | ENSSSSCG00000005979 | 31533  |
| MSTRG. 28915 | ENSSSSCG00000005979 | 34181  |
| MSTRG. 28916 | ENSSSSCG00000005979 | 35457  |
| MSTRG. 28926 | ENSSSSCG00000023385 | 41920  |
| MSTRG. 28946 | ENSSSSCG00000021004 | 21379  |
| MSTRG. 29213 | ENSSSSCG00000006063 | 84637  |
| MSTRG. 2930  | ENSSSSCG00000004893 | 30060  |
| MSTRG. 29310 | ENSSSSCG00000006083 | 100640 |
| MSTRG. 29315 | ENSSSSCG00000006084 | 65906  |
| MSTRG. 2940  | ENSSSSCG00000025744 | 126794 |
| MSTRG. 29402 | ENSSSSCG00000006115 | 60549  |
| MSTRG. 29406 | ENSSSSCG00000006115 | 101377 |
| MSTRG. 2941  | ENSSSSCG00000025744 | 151314 |
| MSTRG. 29484 | ENSSSSCG00000006157 | 3794   |
| MSTRG. 2951  | ENSSSSCG00000004899 | 108775 |
| MSTRG. 29514 | ENSSSSCG00000006161 | 167689 |
| MSTRG. 29566 | ENSSSSCG00000006171 | 458531 |
| MSTRG. 29599 | ENSSSSCG00000022013 | 41126  |
| MSTRG. 29728 | ENSSSSCG00000006205 | 43860  |
| MSTRG. 29768 | ENSSSSCG00000006213 | 8072   |
| MSTRG. 29806 | ENSSSSCG00000006218 | 27712  |
| MSTRG. 29837 | ENSSSSCG00000006225 | 20618  |
| MSTRG. 29899 | ENSSSSCG00000006235 | 317131 |

|              |                    |        |
|--------------|--------------------|--------|
| MSTRG. 29951 | ENSSSCG00000006245 | 13325  |
| MSTRG. 30014 | ENSSSCG00000006285 | 1172   |
| MSTRG. 30047 | ENSSSCG00000006301 | 35592  |
| MSTRG. 30112 | ENSSSCG00000006333 | 31384  |
| MSTRG. 30167 | ENSSSCG00000006361 | 8875   |
| MSTRG. 30213 | ENSSSCG00000006390 | 18488  |
| MSTRG. 30258 | ENSSSCG00000024970 | 216714 |
| MSTRG. 30317 | ENSSSCG00000006507 | 17376  |
| MSTRG. 30349 | ENSSSCG00000006540 | 5048   |
| MSTRG. 30438 | ENSSSCG00000006621 | 22758  |
| MSTRG. 30548 | ENSSSCG00000006703 | 16986  |
| MSTRG. 30551 | ENSSSCG00000006704 | 18556  |
| MSTRG. 30552 | ENSSSCG00000006704 | 14335  |
| MSTRG. 30555 | ENSSSCG00000021345 | 0      |
| MSTRG. 30571 | ENSSSCG00000006705 | 81051  |
| MSTRG. 30755 | ENSSSCG00000006802 | 3188   |
| MSTRG. 30774 | ENSSSCG00000006829 | 27672  |
| MSTRG. 30781 | ENSSSCG00000006834 | 5390   |
| MSTRG. 30816 | ENSSSCG00000006845 | 9839   |
| MSTRG. 30827 | ENSSSCG00000006848 | 36069  |
| MSTRG. 30829 | ENSSSCG00000006848 | 43422  |
| MSTRG. 30833 | ENSSSCG00000006848 | 119581 |
| MSTRG. 30835 | ENSSSCG00000006848 | 126098 |
| MSTRG. 30929 | ENSSSCG00000006879 | 341594 |
| MSTRG. 3094  | ENSSSCG00000022696 | 63822  |
| MSTRG. 30976 | ENSSSCG00000006883 | 73977  |
| MSTRG. 30980 | ENSSSCG00000021743 | 110911 |
| MSTRG. 30988 | ENSSSCG00000006888 | 44971  |
| MSTRG. 31008 | ENSSSCG00000006892 | 19615  |
| MSTRG. 31035 | ENSSSCG00000006900 | 29227  |
| MSTRG. 31038 | ENSSSCG00000006900 | 17613  |
| MSTRG. 31070 | ENSSSCG00000027251 | 32117  |
| MSTRG. 31072 | ENSSSCG00000006912 | 123387 |
| MSTRG. 31086 | ENSSSCG00000022534 | 35905  |
| MSTRG. 31096 | ENSSSCG00000029402 | 17810  |
| MSTRG. 31104 | ENSSSCG00000022090 | 0      |
| MSTRG. 31105 | ENSSSCG00000022090 | 0      |
| MSTRG. 31109 | ENSSSCG00000022090 | 0      |
| MSTRG. 31110 | ENSSSCG00000022090 | 0      |
| MSTRG. 31112 | ENSSSCG00000022090 | 0      |
| MSTRG. 31127 | ENSSSCG00000006924 | 15648  |
| MSTRG. 31132 | ENSSSCG00000006926 | 35527  |
| MSTRG. 31133 | ENSSSCG00000006926 | 35777  |
| MSTRG. 31134 | ENSSSCG00000006926 | 31818  |
| MSTRG. 31161 | ENSSSCG00000006927 | 181219 |
| MSTRG. 31202 | ENSSSCG00000006940 | 37010  |
| MSTRG. 31212 | ENSSSCG00000006940 | 92756  |

|              |                    |        |
|--------------|--------------------|--------|
| MSTRG. 31258 | ENSSSCG00000000019 | 18127  |
| MSTRG. 31262 | ENSSSCG00000000025 | 26036  |
| MSTRG. 31283 | ENSSSCG00000000036 | 81100  |
| MSTRG. 31290 | ENSSSCG00000000038 | 21636  |
| MSTRG. 31351 | ENSSSCG00000000079 | 33728  |
| MSTRG. 31361 | ENSSSCG00000024216 | 0      |
| MSTRG. 31363 | ENSSSCG00000000086 | 925    |
| MSTRG. 31411 | ENSSSCG00000028531 | 20300  |
| MSTRG. 31426 | ENSSSCG00000027106 | 17898  |
| MSTRG. 31486 | ENSSSCG00000000164 | 309004 |
| MSTRG. 31490 | ENSSSCG00000000166 | 17081  |
| MSTRG. 31591 | ENSSSCG00000030600 | 36083  |
| MSTRG. 31605 | ENSSSCG00000026061 | 164261 |
| MSTRG. 31675 | ENSSSCG00000000272 | 41341  |
| MSTRG. 31720 | ENSSSCG00000026482 | 5619   |
| MSTRG. 31745 | ENSSSCG00000000373 | 7545   |
| MSTRG. 31758 | ENSSSCG00000000377 | 5666   |
| MSTRG. 3182  | ENSSSCG00000004963 | 33097  |
| MSTRG. 31960 | ENSSSCG00000000471 | 134013 |
| MSTRG. 31998 | ENSSSCG00000027797 | 69063  |
| MSTRG. 32002 | ENSSSCG00000000490 | 52236  |
| MSTRG. 32046 | ENSSSCG00000000502 | 110002 |
| MSTRG. 32132 | ENSSSCG00000000530 | 33941  |
| MSTRG. 32161 | ENSSSCG00000000536 | 48354  |
| MSTRG. 32188 | ENSSSCG00000022332 | 22352  |
| MSTRG. 32189 | ENSSSCG00000022288 | 74757  |
| MSTRG. 32301 | ENSSSCG00000000583 | 27134  |
| MSTRG. 32312 | ENSSSCG00000028662 | 224933 |
| MSTRG. 32568 | ENSSSCG00000024219 | 11750  |
| MSTRG. 32571 | ENSSSCG00000000727 | 12844  |
| MSTRG. 32598 | ENSSSCG00000000746 | 11596  |
| MSTRG. 32619 | ENSSSCG00000027540 | 127443 |
| MSTRG. 32644 | ENSSSCG00000000765 | 20252  |
| MSTRG. 32658 | ENSSSCG00000000767 | 40177  |
| MSTRG. 32771 | ENSSSCG00000000807 | 60598  |
| MSTRG. 3278  | ENSSSCG00000005012 | 96609  |
| MSTRG. 32781 | ENSSSCG00000000811 | 0      |
| MSTRG. 32791 | ENSSSCG00000027859 | 33192  |
| MSTRG. 32792 | ENSSSCG00000027859 | 10624  |
| MSTRG. 32819 | ENSSSCG00000000840 | 21620  |
| MSTRG. 32832 | ENSSSCG00000000842 | 28645  |
| MSTRG. 32841 | ENSSSCG00000027792 | 23099  |
| MSTRG. 32846 | ENSSSCG00000000837 | 241813 |
| MSTRG. 32847 | ENSSSCG00000000838 | 211741 |
| MSTRG. 32848 | ENSSSCG00000000838 | 273703 |
| MSTRG. 32855 | ENSSSCG00000022172 | 11388  |
| MSTRG. 32902 | ENSSSCG00000023972 | 40655  |

|              |                    |        |
|--------------|--------------------|--------|
| MSTRG. 32911 | ENSSSCG00000000863 | 57849  |
| MSTRG. 32944 | ENSSSCG00000000870 | 18151  |
| MSTRG. 32957 | ENSSSCG00000000871 | 102684 |
| MSTRG. 32977 | ENSSSCG00000020741 | 9863   |
| MSTRG. 33004 | ENSSSCG00000029091 | 86543  |
| MSTRG. 33005 | ENSSSCG00000029091 | 82065  |
| MSTRG. 33009 | ENSSSCG00000029091 | 67398  |
| MSTRG. 3303  | ENSSSCG00000024414 | 47258  |
| MSTRG. 3305  | ENSSSCG0000005023  | 39479  |
| MSTRG. 33062 | ENSSSCG00000023803 | 51178  |
| MSTRG. 33148 | ENSSSCG00000000911 | 180032 |
| MSTRG. 33167 | ENSSSCG00000027898 | 221961 |
| MSTRG. 3328  | ENSSSCG00000028092 | 127138 |
| MSTRG. 33291 | ENSSSCG00000021454 | 33990  |
| MSTRG. 33320 | ENSSSCG00000000983 | 12177  |
| MSTRG. 33346 | ENSSSCG00000024687 | 46928  |
| MSTRG. 33387 | ENSSSCG0000002656  | 89092  |
| MSTRG. 33392 | ENSSSCG0000002656  | 70799  |
| MSTRG. 33393 | ENSSSCG0000002655  | 22556  |
| MSTRG. 33394 | ENSSSCG0000002656  | 60583  |
| MSTRG. 33403 | ENSSSCG00000029034 | 254782 |
| MSTRG. 33420 | ENSSSCG0000002662  | 0      |
| MSTRG. 33424 | ENSSSCG0000002664  | 73852  |
| MSTRG. 33434 | ENSSSCG0000002667  | 31708  |
| MSTRG. 33484 | ENSSSCG0000002690  | 156337 |
| MSTRG. 33488 | ENSSSCG0000002690  | 61090  |
| MSTRG. 33492 | ENSSSCG00000027458 | 83247  |
| MSTRG. 33494 | ENSSSCG00000027458 | 59922  |
| MSTRG. 33501 | ENSSSCG00000027458 | 878093 |
| MSTRG. 33612 | ENSSSCG0000002699  | 0      |
| MSTRG. 33635 | ENSSSCG0000002702  | 0      |
| MSTRG. 33658 | ENSSSCG00000022668 | 70179  |
| MSTRG. 33660 | ENSSSCG00000022668 | 94935  |
| MSTRG. 33682 | ENSSSCG0000002715  | 51612  |
| MSTRG. 33690 | ENSSSCG00000028656 | 19041  |
| MSTRG. 33697 | ENSSSCG0000002719  | 1396   |
| MSTRG. 33725 | ENSSSCG0000002738  | 12066  |
| MSTRG. 33735 | ENSSSCG00000022502 | 3571   |
| MSTRG. 3376  | ENSSSCG00000021862 | 12486  |
| MSTRG. 33783 | ENSSSCG0000002753  | 17257  |
| MSTRG. 33804 | ENSSSCG00000025151 | 13641  |
| MSTRG. 33831 | ENSSSCG0000002809  | 17392  |
| MSTRG. 33843 | ENSSSCG0000002805  | 16000  |
| MSTRG. 3390  | ENSSSCG0000005038  | 94001  |
| MSTRG. 34    | ENSSSCG00000027404 | 168908 |
| MSTRG. 34016 | ENSSSCG0000002838  | 183556 |
| MSTRG. 34035 | ENSSSCG0000002843  | 15347  |

|              |                    |       |
|--------------|--------------------|-------|
| MSTRG. 34042 | ENSSSCG00000028289 | 25939 |
| MSTRG. 34075 | ENSSSCG00000028141 | 0     |
| MSTRG. 34083 | ENSSSCG00000028141 | 3950  |
| MSTRG. 34140 | ENSSSCG0000002869  | 24810 |
| MSTRG. 34163 | ENSSSCG0000002879  | 20797 |
| MSTRG. 34164 | ENSSSCG0000002879  | 19851 |
| MSTRG. 34219 | ENSSSCG0000002933  | 14300 |
| MSTRG. 3422  | ENSSSCG0000005047  | 34453 |
| MSTRG. 34220 | ENSSSCG00000029875 | 19031 |
| MSTRG. 34224 | ENSSSCG00000029875 | 7949  |
| MSTRG. 34264 | ENSSSCG00000029420 | 6901  |
| MSTRG. 34268 | ENSSSCG00000023635 | 20477 |
| MSTRG. 34269 | ENSSSCG00000023635 | 18881 |
| MSTRG. 34283 | ENSSSCG0000002950  | 71155 |
| MSTRG. 34293 | ENSSSCG0000002954  | 9926  |
| MSTRG. 34311 | ENSSSCG0000002967  | 40370 |
| MSTRG. 34312 | ENSSSCG0000002967  | 13629 |
| MSTRG. 34323 | ENSSSCG00000026261 | 5551  |
| MSTRG. 34360 | ENSSSCG00000025109 | 12168 |
| MSTRG. 34367 | ENSSSCG0000002997  | 2210  |
| MSTRG. 34402 | ENSSSCG00000026723 | 18726 |
| MSTRG. 34404 | ENSSSCG0000003018  | 0     |
| MSTRG. 34420 | ENSSSCG0000003047  | 0     |
| MSTRG. 34459 | ENSSSCG0000003071  | 46895 |
| MSTRG. 34460 | ENSSSCG0000003070  | 23751 |
| MSTRG. 34471 | ENSSSCG00000028218 | 17998 |
| MSTRG. 34473 | ENSSSCG0000003078  | 19551 |
| MSTRG. 34474 | ENSSSCG0000003079  | 15931 |
| MSTRG. 34477 | ENSSSCG0000003081  | 13055 |
| MSTRG. 34490 | ENSSSCG00000024772 | 0     |
| MSTRG. 34524 | ENSSSCG00000024240 | 12206 |
| MSTRG. 34570 | ENSSSCG00000027364 | 0     |
| MSTRG. 34578 | ENSSSCG0000003138  | 7462  |
| MSTRG. 34637 | ENSSSCG00000029646 | 31407 |
| MSTRG. 34638 | ENSSSCG0000003207  | 31100 |
| MSTRG. 34642 | ENSSSCG0000003212  | 8977  |
| MSTRG. 34656 | ENSSSCG0000003222  | 30713 |
| MSTRG. 3466  | ENSSSCG0000005053  | 13517 |
| MSTRG. 34679 | ENSSSCG0000003235  | 10592 |
| MSTRG. 34693 | ENSSSCG0000003244  | 36439 |
| MSTRG. 34694 | ENSSSCG0000003244  | 42100 |
| MSTRG. 34696 | ENSSSCG0000003241  | 1484  |
| MSTRG. 34707 | ENSSSCG00000025665 | 0     |
| MSTRG. 34712 | ENSSSCG00000025665 | 32990 |
| MSTRG. 34714 | ENSSSCG00000025665 | 38809 |
| MSTRG. 34715 | ENSSSCG00000025665 | 52009 |
| MSTRG. 34725 | ENSSSCG0000003252  | 41803 |

|              |                     |        |
|--------------|---------------------|--------|
| MSTRG. 34769 | ENSSSCG00000022319  | 0      |
| MSTRG. 34770 | ENSSSCG00000022319  | 0      |
| MSTRG. 34774 | ENSSSCG00000022319  | 0      |
| MSTRG. 3478  | ENSSSCG00000005055  | 21339  |
| MSTRG. 34803 | ENSSSCG00000003322  | 15860  |
| MSTRG. 34806 | ENSSSCG00000003322  | 4618   |
| MSTRG. 34819 | ENSSSCG00000002941  | 6416   |
| MSTRG. 34866 | ENSSSCG00000003989  | 24646  |
| MSTRG. 34867 | ENSSSCG00000003994  | 16512  |
| MSTRG. 34871 | ENSSSCG000000021888 | 6094   |
| MSTRG. 34880 | ENSSSCG00000003998  | 19636  |
| MSTRG. 34883 | ENSSSCG00000004002  | 10424  |
| MSTRG. 34891 | ENSSSCG000000027987 | 6473   |
| MSTRG. 34904 | ENSSSCG000000023973 | 13948  |
| MSTRG. 34907 | ENSSSCG000000030505 | 11510  |
| MSTRG. 34910 | ENSSSCG000000024430 | 4030   |
| MSTRG. 34923 | ENSSSCG00000003329  | 12526  |
| MSTRG. 34924 | ENSSSCG00000003329  | 12532  |
| MSTRG. 34940 | ENSSSCG00000003345  | 1410   |
| MSTRG. 34945 | ENSSSCG00000003343  | 22958  |
| MSTRG. 34954 | ENSSSCG000000024223 | 17120  |
| MSTRG. 3497  | ENSSSCG00000005056  | 125292 |
| MSTRG. 34976 | ENSSSCG000000030596 | 1101   |
| MSTRG. 34998 | ENSSSCG00000003388  | 50089  |
| MSTRG. 35006 | ENSSSCG00000003388  | 9402   |
| MSTRG. 35047 | ENSSSCG00000003396  | 97860  |
| MSTRG. 35075 | ENSSSCG00000003402  | 7825   |
| MSTRG. 35155 | ENSSSCG00000003475  | 23760  |
| MSTRG. 35218 | ENSSSCG00000003513  | 65345  |
| MSTRG. 35259 | ENSSSCG000000025500 | 1516   |
| MSTRG. 35307 | ENSSSCG000000024260 | 34500  |
| MSTRG. 35318 | ENSSSCG00000003543  | 36144  |
| MSTRG. 35319 | ENSSSCG00000003543  | 49606  |
| MSTRG. 35322 | ENSSSCG00000003542  | 22764  |
| MSTRG. 35340 | ENSSSCG00000003549  | 42723  |
| MSTRG. 35352 | ENSSSCG00000003556  | 33082  |
| MSTRG. 35388 | ENSSSCG00000003579  | 39715  |
| MSTRG. 35392 | ENSSSCG000000027894 | 29661  |
| MSTRG. 35472 | ENSSSCG00000003606  | 38776  |
| MSTRG. 35474 | ENSSSCG00000003605  | 10225  |
| MSTRG. 35532 | ENSSSCG000000027035 | 0      |
| MSTRG. 35558 | ENSSSCG000000024887 | 41992  |
| MSTRG. 35591 | ENSSSCG00000003650  | 551    |
| MSTRG. 35631 | ENSSSCG000000030438 | 17354  |
| MSTRG. 35632 | ENSSSCG000000030438 | 21353  |
| MSTRG. 35668 | ENSSSCG000000021660 | 88534  |
| MSTRG. 35707 | ENSSSCG00000003683  | 76532  |

|              |                    |        |
|--------------|--------------------|--------|
| MSTRG. 35722 | ENSSSCG00000029947 | 297309 |
| MSTRG. 35729 | ENSSSCG00000003687 | 110769 |
| MSTRG. 3573  | ENSSSCG00000005073 | 65161  |
| MSTRG. 35860 | ENSSSCG00000025478 | 119394 |
| MSTRG. 35861 | ENSSSCG00000025478 | 119394 |
| MSTRG. 35866 | ENSSSCG00000021424 | 78761  |
| MSTRG. 35950 | ENSSSCG00000021683 | 136276 |
| MSTRG. 35991 | ENSSSCG00000003727 | 21048  |
| MSTRG. 36175 | ENSSSCG00000020921 | 52843  |
| MSTRG. 36203 | ENSSSCG00000024441 | 102985 |
| MSTRG. 36272 | ENSSSCG00000023741 | 92921  |
| MSTRG. 36293 | ENSSSCG00000003805 | 40904  |
| MSTRG. 36312 | ENSSSCG00000003809 | 23096  |
| MSTRG. 36384 | ENSSSCG00000003821 | 163287 |
| MSTRG. 36439 | ENSSSCG00000025097 | 13687  |
| MSTRG. 36463 | ENSSSCG00000028748 | 54058  |
| MSTRG. 36478 | ENSSSCG00000003850 | 13364  |
| MSTRG. 36487 | ENSSSCG00000003851 | 72378  |
| MSTRG. 36543 | ENSSSCG00000022425 | 57483  |
| MSTRG. 36587 | ENSSSCG00000003876 | 6468   |
| MSTRG. 36602 | ENSSSCG00000003882 | 172286 |
| MSTRG. 36606 | ENSSSCG00000003884 | 255401 |
| MSTRG. 36607 | ENSSSCG00000003884 | 244583 |
| MSTRG. 36729 | ENSSSCG00000027640 | 42430  |
| MSTRG. 36753 | ENSSSCG00000030906 | 0      |
| MSTRG. 36792 | ENSSSCG00000003971 | 112271 |
| MSTRG. 36797 | ENSSSCG00000003976 | 38221  |
| MSTRG. 36806 | ENSSSCG00000000985 | 112136 |
| MSTRG. 36829 | ENSSSCG00000028777 | 267706 |
| MSTRG. 36841 | ENSSSCG00000001010 | 10396  |
| MSTRG. 36859 | ENSSSCG00000025582 | 17227  |
| MSTRG. 36862 | ENSSSCG00000001002 | 31211  |
| MSTRG. 36863 | ENSSSCG00000001002 | 30188  |
| MSTRG. 36873 | ENSSSCG00000000999 | 153336 |
| MSTRG. 36942 | ENSSSCG00000001046 | 162760 |
| MSTRG. 3697  | ENSSSCG00000005101 | 37886  |
| MSTRG. 36970 | ENSSSCG00000001053 | 87954  |
| MSTRG. 36971 | ENSSSCG00000001053 | 73111  |
| MSTRG. 36990 | ENSSSCG00000001054 | 104555 |
| MSTRG. 37002 | ENSSSCG00000001061 | 177285 |
| MSTRG. 37022 | ENSSSCG00000001067 | 37485  |
| MSTRG. 37166 | ENSSSCG00000001081 | 54122  |
| MSTRG. 37188 | ENSSSCG00000001096 | 94868  |
| MSTRG. 37190 | ENSSSCG00000001097 | 115022 |
| MSTRG. 37191 | ENSSSCG00000001099 | 162716 |
| MSTRG. 37192 | ENSSSCG00000001099 | 110972 |
| MSTRG. 37207 | ENSSSCG00000028147 | 13059  |

|              |                     |        |
|--------------|---------------------|--------|
| MSTRG. 37214 | ENSSSCG00000021863  | 5690   |
| MSTRG. 37221 | ENSSSCG00000025957  | 18084  |
| MSTRG. 37245 | ENSSSCG00000001202  | 8594   |
| MSTRG. 37266 | ENSSSCG00000001229  | 0      |
| MSTRG. 37268 | ENSSSCG00000001229  | 0      |
| MSTRG. 37298 | ENSSSCG00000001342  | 26234  |
| MSTRG. 37380 | ENSSSCG00000030901  | 0      |
| MSTRG. 37391 | ENSSSCG00000030874  | 106878 |
| MSTRG. 37393 | ENSSSCG00000030874  | 89426  |
| MSTRG. 37394 | ENSSSCG00000030874  | 37997  |
| MSTRG. 37395 | ENSSSCG00000030874  | 55024  |
| MSTRG. 37396 | ENSSSCG00000030874  | 47424  |
| MSTRG. 37398 | ENSSSCG00000030874  | 69859  |
| MSTRG. 37407 | ENSSSCG00000001447  | 0      |
| MSTRG. 37411 | ENSSSCG00000001455  | 2740   |
| MSTRG. 37427 | ENSSSCG00000001468  | 9446   |
| MSTRG. 37435 | ENSSSCG00000001472  | 3941   |
| MSTRG. 37511 | ENSSSCG00000001498  | 45921  |
| MSTRG. 37536 | ENSSSCG000000023160 | 13661  |
| MSTRG. 37561 | ENSSSCG00000001544  | 141086 |
| MSTRG. 37575 | ENSSSCG00000001550  | 16037  |
| MSTRG. 37585 | ENSSSCG00000001561  | 1659   |
| MSTRG. 37610 | ENSSSCG00000001573  | 38396  |
| MSTRG. 37695 | ENSSSCG00000001616  | 7603   |
| MSTRG. 37714 | ENSSSCG000000026752 | 16114  |
| MSTRG. 37747 | ENSSSCG000000026741 | 4585   |
| MSTRG. 37821 | ENSSSCG00000001699  | 771    |
| MSTRG. 37837 | ENSSSCG00000001710  | 44782  |
| MSTRG. 37910 | ENSSSCG000000025488 | 52322  |
| MSTRG. 37934 | ENSSSCG00000001755  | 20833  |
| MSTRG. 37967 | ENSSSCG00000001779  | 63337  |
| MSTRG. 37996 | ENSSSCG00000001806  | 30836  |
| MSTRG. 38036 | ENSSSCG00000001817  | 23683  |
| MSTRG. 38074 | ENSSSCG00000030174  | 57792  |
| MSTRG. 38100 | ENSSSCG00000001855  | 25032  |
| MSTRG. 38101 | ENSSSCG000000025594 | 6252   |
| MSTRG. 38150 | ENSSSCG00000001901  | 5822   |
| MSTRG. 38179 | ENSSSCG00000001912  | 32712  |
| MSTRG. 38182 | ENSSSCG00000001914  | 5951   |
| MSTRG. 38318 | ENSSSCG00000001966  | 73753  |
| MSTRG. 38425 | ENSSSCG00000001977  | 309172 |
| MSTRG. 38426 | ENSSSCG00000001977  | 258574 |
| MSTRG. 38456 | ENSSSCG00000001994  | 6648   |
| MSTRG. 38489 | ENSSSCG00000002021  | 1971   |
| MSTRG. 38534 | ENSSSCG00000002049  | 13430  |
| MSTRG. 38567 | ENSSSCG00000002085  | 11082  |
| MSTRG. 38588 | ENSSSCG000000022900 | 33196  |

|              |                     |        |
|--------------|---------------------|--------|
| MSTRG. 38592 | ENSSSCG00000002134  | 13058  |
| MSTRG. 38603 | ENSSSCG00000002144  | 10578  |
| MSTRG. 3862  | ENSSSCG000000030782 | 0      |
| MSTRG. 38709 | ENSSSCG00000002268  | 1412   |
| MSTRG. 38762 | ENSSSCG00000002290  | 25350  |
| MSTRG. 38888 | ENSSSCG000000028304 | 87938  |
| MSTRG. 38908 | ENSSSCG00000002313  | 26399  |
| MSTRG. 38937 | ENSSSCG00000002332  | 141157 |
| MSTRG. 38966 | ENSSSCG000000022178 | 109756 |
| MSTRG. 38988 | ENSSSCG00000002350  | 39648  |
| MSTRG. 39140 | ENSSSCG00000002411  | 45035  |
| MSTRG. 39169 | ENSSSCG00000002424  | 55468  |
| MSTRG. 39254 | ENSSSCG00000002456  | 42673  |
| MSTRG. 39283 | ENSSSCG000000028225 | 38486  |
| MSTRG. 39321 | ENSSSCG00000002512  | 0      |
| MSTRG. 39324 | ENSSSCG00000002512  | 20705  |
| MSTRG. 39348 | ENSSSCG00000002523  | 63217  |
| MSTRG. 39351 | ENSSSCG00000002523  | 58275  |
| MSTRG. 39357 | ENSSSCG00000002524  | 93711  |
| MSTRG. 39359 | ENSSSCG00000002525  | 97144  |
| MSTRG. 39376 | ENSSSCG00000002541  | 13233  |
| MSTRG. 39378 | ENSSSCG00000002536  | 23297  |
| MSTRG. 39384 | ENSSSCG00000002543  | 878    |
| MSTRG. 39393 | ENSSSCG00000002546  | 8664   |
| MSTRG. 39427 | ENSSSCG000000027337 | 27734  |
| MSTRG. 39471 | ENSSSCG00000008683  | 0      |
| MSTRG. 39474 | ENSSSCG000000023970 | 0      |
| MSTRG. 39476 | ENSSSCG00000008685  | 2984   |
| MSTRG. 39485 | ENSSSCG000000027718 | 13963  |
| MSTRG. 39577 | ENSSSCG000000027862 | 15340  |
| MSTRG. 39578 | ENSSSCG000000027862 | 2577   |
| MSTRG. 39587 | ENSSSCG000000029508 | 201588 |
| MSTRG. 39613 | ENSSSCG00000008747  | 47222  |
| MSTRG. 39657 | ENSSSCG00000008756  | 57288  |
| MSTRG. 39672 | ENSSSCG00000008759  | 175842 |
| MSTRG. 39674 | ENSSSCG000000022155 | 102348 |
| MSTRG. 39717 | ENSSSCG00000008762  | 158726 |
| MSTRG. 39789 | ENSSSCG00000008772  | 64553  |
| MSTRG. 39856 | ENSSSCG000000023785 | 49009  |
| MSTRG. 39900 | ENSSSCG000000025039 | 102629 |
| MSTRG. 39943 | ENSSSCG000000024428 | 38369  |
| MSTRG. 39955 | ENSSSCG000000024496 | 177799 |
| MSTRG. 39958 | ENSSSCG000000022945 | 268594 |
| MSTRG. 4     | ENSSSCG000000027726 | 33900  |
| MSTRG. 40    | ENSSSCG00000004020  | 46329  |
| MSTRG. 4010  | ENSSSCG00000005220  | 1053   |
| MSTRG. 40124 | ENSSSCG00000008828  | 112527 |

|              |                    |        |
|--------------|--------------------|--------|
| MSTRG. 40138 | ENSSSCG00000008828 | 14620  |
| MSTRG. 40140 | ENSSSCG00000008831 | 76744  |
| MSTRG. 40173 | ENSSSCG00000021623 | 71526  |
| MSTRG. 40275 | ENSSSCG00000008874 | 52307  |
| MSTRG. 40298 | ENSSSCG00000008878 | 67102  |
| MSTRG. 403   | ENSSSCG00000004113 | 162781 |
| MSTRG. 40329 | ENSSSCG00000026079 | 16230  |
| MSTRG. 40336 | ENSSSCG00000029636 | 294232 |
| MSTRG. 40354 | ENSSSCG00000008896 | 59777  |
| MSTRG. 40356 | ENSSSCG00000008896 | 45002  |
| MSTRG. 40373 | ENSSSCG00000027403 | 41418  |
| MSTRG. 40394 | ENSSSCG00000008909 | 38994  |
| MSTRG. 40431 | ENSSSCG00000023731 | 34181  |
| MSTRG. 40476 | ENSSSCG00000025226 | 0      |
| MSTRG. 40503 | ENSSSCG00000008947 | 38612  |
| MSTRG. 40544 | ENSSSCG00000008953 | 10123  |
| MSTRG. 40545 | ENSSSCG00000008953 | 3957   |
| MSTRG. 40556 | ENSSSCG00000008969 | 14973  |
| MSTRG. 40559 | ENSSSCG00000022940 | 29640  |
| MSTRG. 40560 | ENSSSCG00000022940 | 23188  |
| MSTRG. 40561 | ENSSSCG00000022940 | 28803  |
| MSTRG. 40575 | ENSSSCG00000008978 | 29406  |
| MSTRG. 40586 | ENSSSCG00000008985 | 2788   |
| MSTRG. 40594 | ENSSSCG00000008988 | 8597   |
| MSTRG. 40600 | ENSSSCG00000028731 | 56639  |
| MSTRG. 40602 | ENSSSCG00000008989 | 103123 |
| MSTRG. 40606 | ENSSSCG00000008990 | 91464  |
| MSTRG. 40623 | ENSSSCG00000008993 | 25127  |
| MSTRG. 40650 | ENSSSCG00000009007 | 67264  |
| MSTRG. 40651 | ENSSSCG00000009007 | 115475 |
| MSTRG. 40652 | ENSSSCG00000009007 | 107980 |
| MSTRG. 40707 | ENSSSCG00000025372 | 2547   |
| MSTRG. 40722 | ENSSSCG00000020717 | 152688 |
| MSTRG. 40791 | ENSSSCG00000030635 | 103167 |
| MSTRG. 40812 | ENSSSCG00000009030 | 23770  |
| MSTRG. 40818 | ENSSSCG00000030044 | 14192  |
| MSTRG. 40840 | ENSSSCG00000009039 | 46620  |
| MSTRG. 40843 | ENSSSCG00000009039 | 10683  |
| MSTRG. 40844 | ENSSSCG00000009042 | 38683  |
| MSTRG. 40857 | ENSSSCG00000009045 | 71189  |
| MSTRG. 40867 | ENSSSCG00000009048 | 159528 |
| MSTRG. 40931 | ENSSSCG00000020711 | 38297  |
| MSTRG. 40933 | ENSSSCG00000020711 | 23953  |
| MSTRG. 40939 | ENSSSCG00000009062 | 0      |
| MSTRG. 40944 | ENSSSCG00000009062 | 79926  |
| MSTRG. 40982 | ENSSSCG00000009076 | 21342  |
| MSTRG. 41    | ENSSSCG00000004020 | 10789  |

|              |                    |        |
|--------------|--------------------|--------|
| MSTRG. 41021 | ENSSSCG00000009086 | 10567  |
| MSTRG. 41039 | ENSSSCG00000026698 | 35771  |
| MSTRG. 41050 | ENSSSCG00000025543 | 94254  |
| MSTRG. 41053 | ENSSSCG00000025543 | 0      |
| MSTRG. 41059 | ENSSSCG00000023174 | 37799  |
| MSTRG. 41061 | ENSSSCG00000009110 | 18090  |
| MSTRG. 41071 | ENSSSCG00000030024 | 22486  |
| MSTRG. 41081 | ENSSSCG00000009114 | 75945  |
| MSTRG. 41089 | ENSSSCG00000009119 | 17413  |
| MSTRG. 41097 | ENSSSCG00000025714 | 7552   |
| MSTRG. 41115 | ENSSSCG00000009123 | 304597 |
| MSTRG. 41183 | ENSSSCG00000009140 | 7379   |
| MSTRG. 41209 | ENSSSCG00000009151 | 51329  |
| MSTRG. 4121  | ENSSSCG00000021802 | 10620  |
| MSTRG. 41215 | ENSSSCG00000022709 | 60379  |
| MSTRG. 41274 | ENSSSCG00000009157 | 123560 |
| MSTRG. 41277 | ENSSSCG00000009160 | 36679  |
| MSTRG. 41293 | ENSSSCG00000026525 | 0      |
| MSTRG. 41326 | ENSSSCG00000009173 | 35878  |
| MSTRG. 41329 | ENSSSCG00000009178 | 2663   |
| MSTRG. 41339 | ENSSSCG00000009177 | 26793  |
| MSTRG. 41340 | ENSSSCG00000009177 | 27111  |
| MSTRG. 41361 | ENSSSCG00000009179 | 51356  |
| MSTRG. 41363 | ENSSSCG00000009180 | 36883  |
| MSTRG. 41368 | ENSSSCG00000009185 | 15676  |
| MSTRG. 41374 | ENSSSCG00000028420 | 22370  |
| MSTRG. 41421 | ENSSSCG00000009194 | 38221  |
| MSTRG. 41457 | ENSSSCG00000024105 | 77803  |
| MSTRG. 41459 | ENSSSCG00000024105 | 0      |
| MSTRG. 41460 | ENSSSCG00000024105 | 0      |
| MSTRG. 41469 | ENSSSCG00000009222 | 46544  |
| MSTRG. 41482 | ENSSSCG00000023593 | 24989  |
| MSTRG. 41499 | ENSSSCG00000028952 | 97076  |
| MSTRG. 41512 | ENSSSCG00000009231 | 103222 |
| MSTRG. 41513 | ENSSSCG00000009231 | 99207  |
| MSTRG. 41519 | ENSSSCG00000009234 | 31714  |
| MSTRG. 41528 | ENSSSCG00000009238 | 24104  |
| MSTRG. 41533 | ENSSSCG00000009240 | 23263  |
| MSTRG. 41538 | ENSSSCG00000009243 | 55122  |
| MSTRG. 41545 | ENSSSCG00000009243 | 11376  |
| MSTRG. 41549 | ENSSSCG00000009243 | 15889  |
| MSTRG. 41572 | ENSSSCG00000029507 | 41154  |
| MSTRG. 41573 | ENSSSCG00000029507 | 40722  |
| MSTRG. 41575 | ENSSSCG00000029507 | 115941 |
| MSTRG. 41576 | ENSSSCG00000029507 | 118735 |
| MSTRG. 41580 | ENSSSCG00000029507 | 133873 |
| MSTRG. 41582 | ENSSSCG00000009250 | 50642  |

|              |                    |        |
|--------------|--------------------|--------|
| MSTRG. 41585 | ENSSSCG00000029061 | 27018  |
| MSTRG. 416   | ENSSSCG00000004117 | 23002  |
| MSTRG. 41630 | ENSSSCG00000022070 | 43344  |
| MSTRG. 41648 | ENSSSCG00000014578 | 72232  |
| MSTRG. 41655 | ENSSSCG00000014577 | 14468  |
| MSTRG. 41691 | ENSSSCG00000026560 | 8562   |
| MSTRG. 41701 | ENSSSCG00000014617 | 102917 |
| MSTRG. 41702 | ENSSSCG00000014617 | 104995 |
| MSTRG. 41703 | ENSSSCG00000014618 | 68676  |
| MSTRG. 4172  | ENSSSCG00000005271 | 20285  |
| MSTRG. 41749 | ENSSSCG00000029426 | 26112  |
| MSTRG. 41769 | ENSSSCG00000014803 | 8569   |
| MSTRG. 41776 | ENSSSCG00000022236 | 0      |
| MSTRG. 41791 | ENSSSCG00000014818 | 25297  |
| MSTRG. 41836 | ENSSSCG00000014827 | 12447  |
| MSTRG. 41858 | ENSSSCG00000014845 | 11746  |
| MSTRG. 41864 | ENSSSCG00000021822 | 27255  |
| MSTRG. 41874 | ENSSSCG00000021822 | 61606  |
| MSTRG. 41885 | ENSSSCG00000022695 | 14237  |
| MSTRG. 41905 | ENSSSCG00000014859 | 5251   |
| MSTRG. 41908 | ENSSSCG00000014861 | 13897  |
| MSTRG. 41911 | ENSSSCG00000022902 | 27058  |
| MSTRG. 41917 | ENSSSCG00000022902 | 23714  |
| MSTRG. 41935 | ENSSSCG00000014865 | 68467  |
| MSTRG. 41942 | ENSSSCG00000014871 | 45402  |
| MSTRG. 41993 | ENSSSCG00000014892 | 3397   |
| MSTRG. 42017 | ENSSSCG00000014900 | 16469  |
| MSTRG. 42032 | ENSSSCG00000014903 | 33450  |
| MSTRG. 42056 | ENSSSCG00000014914 | 51238  |
| MSTRG. 42063 | ENSSSCG00000014914 | 11201  |
| MSTRG. 42085 | ENSSSCG00000014920 | 9225   |
| MSTRG. 421   | ENSSSCG00000004121 | 16868  |
| MSTRG. 42113 | ENSSSCG00000014924 | 34891  |
| MSTRG. 42138 | ENSSSCG00000014942 | 0      |
| MSTRG. 42154 | ENSSSCG00000014948 | 52099  |
| MSTRG. 42155 | ENSSSCG00000014948 | 48865  |
| MSTRG. 42216 | ENSSSCG00000014972 | 87573  |
| MSTRG. 42224 | ENSSSCG00000014972 | 30923  |
| MSTRG. 42225 | ENSSSCG00000014972 | 29194  |
| MSTRG. 42228 | ENSSSCG00000014972 | 101633 |
| MSTRG. 42264 | ENSSSCG00000023589 | 12489  |
| MSTRG. 4227  | ENSSSCG00000005277 | 26290  |
| MSTRG. 42273 | ENSSSCG00000027529 | 17039  |
| MSTRG. 4228  | ENSSSCG00000005277 | 21986  |
| MSTRG. 42320 | ENSSSCG00000014988 | 36272  |
| MSTRG. 4234  | ENSSSCG00000005279 | 113863 |
| MSTRG. 42347 | ENSSSCG00000014996 | 181793 |

|              |                    |        |
|--------------|--------------------|--------|
| MSTRG. 4238  | ENSSSCG00000005284 | 202784 |
| MSTRG. 4239  | ENSSSCG00000005284 | 201929 |
| MSTRG. 42415 | ENSSSCG00000027597 | 29015  |
| MSTRG. 42423 | ENSSSCG00000015009 | 29966  |
| MSTRG. 42436 | ENSSSCG00000015011 | 15606  |
| MSTRG. 42454 | ENSSSCG00000015015 | 83242  |
| MSTRG. 42460 | ENSSSCG00000015016 | 74592  |
| MSTRG. 42477 | ENSSSCG00000025649 | 5789   |
| MSTRG. 42508 | ENSSSCG00000022445 | 1940   |
| MSTRG. 42527 | ENSSSCG00000015051 | 10315  |
| MSTRG. 42554 | ENSSSCG00000015056 | 39489  |
| MSTRG. 42585 | ENSSSCG00000015064 | 24791  |
| MSTRG. 42657 | ENSSSCG00000015085 | 14480  |
| MSTRG. 42664 | ENSSSCG00000015093 | 6415   |
| MSTRG. 42674 | ENSSSCG00000021602 | 6603   |
| MSTRG. 42680 | ENSSSCG00000015097 | 33699  |
| MSTRG. 42686 | ENSSSCG00000015100 | 20518  |
| MSTRG. 42702 | ENSSSCG00000015116 | 13353  |
| MSTRG. 42713 | ENSSSCG00000026647 | 36011  |
| MSTRG. 42734 | ENSSSCG00000023728 | 73809  |
| MSTRG. 42756 | ENSSSCG00000015137 | 27429  |
| MSTRG. 42781 | ENSSSCG00000026031 | 12507  |
| MSTRG. 42796 | ENSSSCG00000015224 | 15503  |
| MSTRG. 42816 | ENSSSCG00000015237 | 37560  |
| MSTRG. 42817 | ENSSSCG00000024457 | 63423  |
| MSTRG. 42824 | ENSSSCG00000024457 | 12905  |
| MSTRG. 42836 | ENSSSCG00000015247 | 64608  |
| MSTRG. 42869 | ENSSSCG00000015275 | 6074   |
| MSTRG. 42870 | ENSSSCG00000015275 | 7604   |
| MSTRG. 42881 | ENSSSCG00000015279 | 21710  |
| MSTRG. 42903 | ENSSSCG00000015290 | 18667  |
| MSTRG. 42906 | ENSSSCG00000022398 | 33217  |
| MSTRG. 42915 | ENSSSCG00000015640 | 13147  |
| MSTRG. 42950 | ENSSSCG00000015662 | 4825   |
| MSTRG. 42951 | ENSSSCG00000015663 | 219    |
| MSTRG. 42988 | ENSSSCG00000015311 | 55654  |
| MSTRG. 43005 | ENSSSCG00000029092 | 10172  |
| MSTRG. 4307  | ENSSSCG00000005301 | 23159  |
| MSTRG. 43077 | ENSSSCG00000027372 | 212635 |
| MSTRG. 43082 | ENSSSCG00000027372 | 4804   |
| MSTRG. 43094 | ENSSSCG00000027092 | 0      |
| MSTRG. 43167 | ENSSSCG00000015343 | 47962  |
| MSTRG. 43187 | ENSSSCG00000015343 | 166156 |
| MSTRG. 43213 | ENSSSCG00000015345 | 164344 |
| MSTRG. 43226 | ENSSSCG00000024313 | 74350  |
| MSTRG. 4326  | ENSSSCG00000005320 | 6672   |
| MSTRG. 43354 | ENSSSCG00000020970 | 19536  |

|              |                    |        |
|--------------|--------------------|--------|
| MSTRG. 43355 | ENSSSCG00000020970 | 21328  |
| MSTRG. 4338  | ENSSSCG00000005338 | 68684  |
| MSTRG. 43394 | ENSSSCG00000020870 | 31423  |
| MSTRG. 43407 | ENSSSCG00000026730 | 0      |
| MSTRG. 43408 | ENSSSCG00000026730 | 869    |
| MSTRG. 43434 | ENSSSCG00000025976 | 53134  |
| MSTRG. 43442 | ENSSSCG00000015410 | 76633  |
| MSTRG. 43453 | ENSSSCG00000015411 | 40839  |
| MSTRG. 43471 | ENSSSCG00000028424 | 27938  |
| MSTRG. 4354  | ENSSSCG00000005345 | 178658 |
| MSTRG. 43544 | ENSSSCG00000029078 | 39675  |
| MSTRG. 43547 | ENSSSCG00000022264 | 61357  |
| MSTRG. 43548 | ENSSSCG00000022264 | 68488  |
| MSTRG. 43557 | ENSSSCG00000024575 | 13417  |
| MSTRG. 4356  | ENSSSCG00000005345 | 177799 |
| MSTRG. 43568 | ENSSSCG00000015434 | 167    |
| MSTRG. 43579 | ENSSSCG00000015433 | 0      |
| MSTRG. 43580 | ENSSSCG00000015433 | 0      |
| MSTRG. 43584 | ENSSSCG00000015435 | 44965  |
| MSTRG. 43604 | ENSSSCG00000015435 | 95561  |
| MSTRG. 43605 | ENSSSCG00000015435 | 95531  |
| MSTRG. 43607 | ENSSSCG00000015435 | 83140  |
| MSTRG. 43645 | ENSSSCG00000028585 | 18962  |
| MSTRG. 43650 | ENSSSCG00000015446 | 13289  |
| MSTRG. 43654 | ENSSSCG00000020963 | 115306 |
| MSTRG. 43657 | ENSSSCG00000024028 | 0      |
| MSTRG. 43658 | ENSSSCG00000024028 | 0      |
| MSTRG. 43660 | ENSSSCG00000023584 | 8307   |
| MSTRG. 43677 | ENSSSCG00000015455 | 80102  |
| MSTRG. 43711 | ENSSSCG00000015482 | 32772  |
| MSTRG. 43720 | ENSSSCG00000015484 | 201703 |
| MSTRG. 43737 | ENSSSCG00000015491 | 44289  |
| MSTRG. 43742 | ENSSSCG00000015494 | 13774  |
| MSTRG. 43756 | ENSSSCG00000026540 | 135430 |
| MSTRG. 43888 | ENSSSCG00000030387 | 0      |
| MSTRG. 43889 | ENSSSCG00000030387 | 14787  |
| MSTRG. 43908 | ENSSSCG00000025291 | 18570  |
| MSTRG. 43912 | ENSSSCG00000025934 | 99186  |
| MSTRG. 43920 | ENSSSCG00000015520 | 22442  |
| MSTRG. 4393  | ENSSSCG00000005347 | 46946  |
| MSTRG. 43933 | ENSSSCG00000015520 | 122618 |
| MSTRG. 43941 | ENSSSCG00000027614 | 107074 |
| MSTRG. 43952 | ENSSSCG00000027614 | 33057  |
| MSTRG. 43976 | ENSSSCG00000015524 | 95767  |
| MSTRG. 43987 | ENSSSCG00000015525 | 34227  |
| MSTRG. 43989 | ENSSSCG00000015528 | 27970  |
| MSTRG. 44074 | ENSSSCG00000015544 | 194244 |

|              |                    |        |
|--------------|--------------------|--------|
| MSTRG. 44075 | ENSSSCG00000015544 | 192877 |
| MSTRG. 44076 | ENSSSCG00000015544 | 45979  |
| MSTRG. 44093 | ENSSSCG00000024375 | 3802   |
| MSTRG. 44103 | ENSSSCG00000015553 | 100971 |
| MSTRG. 44104 | ENSSSCG00000015555 | 120345 |
| MSTRG. 44120 | ENSSSCG00000015558 | 77887  |
| MSTRG. 44131 | ENSSSCG00000015560 | 10343  |
| MSTRG. 44138 | ENSSSCG00000015564 | 42265  |
| MSTRG. 44139 | ENSSSCG00000015564 | 159295 |
| MSTRG. 4414  | ENSSSCG00000005358 | 45394  |
| MSTRG. 44148 | ENSSSCG00000015566 | 203466 |
| MSTRG. 44153 | ENSSSCG00000015566 | 80564  |
| MSTRG. 44254 | ENSSSCG00000015598 | 36961  |
| MSTRG. 44271 | ENSSSCG00000024509 | 2982   |
| MSTRG. 44275 | ENSSSCG00000028293 | 85857  |
| MSTRG. 44276 | ENSSSCG00000028293 | 70089  |
| MSTRG. 44296 | ENSSSCG00000015617 | 18515  |
| MSTRG. 44304 | ENSSSCG00000015622 | 42510  |
| MSTRG. 44307 | ENSSSCG00000015622 | 68011  |
| MSTRG. 44308 | ENSSSCG00000015622 | 82189  |
| MSTRG. 44310 | ENSSSCG00000015622 | 90659  |
| MSTRG. 44313 | ENSSSCG00000015622 | 111875 |
| MSTRG. 44316 | ENSSSCG00000029806 | 31804  |
| MSTRG. 4434  | ENSSSCG00000005358 | 226710 |
| MSTRG. 44355 | ENSSSCG00000015637 | 11894  |
| MSTRG. 44363 | ENSSSCG00000015637 | 228386 |
| MSTRG. 44387 | ENSSSCG00000022864 | 5241   |
| MSTRG. 44393 | ENSSSCG00000021953 | 13165  |
| MSTRG. 44444 | ENSSSCG00000028507 | 6363   |
| MSTRG. 44445 | ENSSSCG00000028507 | 15075  |
| MSTRG. 44461 | ENSSSCG00000022771 | 5869   |
| MSTRG. 44464 | ENSSSCG00000022771 | 12343  |
| MSTRG. 44518 | ENSSSCG00000029257 | 3673   |
| MSTRG. 44520 | ENSSSCG00000029257 | 3207   |
| MSTRG. 44529 | ENSSSCG00000026184 | 44316  |
| MSTRG. 44536 | ENSSSCG00000024858 | 18456  |
| MSTRG. 44601 | ENSSSCG00000021371 | 11970  |
| MSTRG. 4461  | ENSSSCG00000005374 | 45502  |
| MSTRG. 44613 | ENSSSCG00000021513 | 13500  |
| MSTRG. 44646 | ENSSSCG00000026715 | 3370   |
| MSTRG. 44714 | ENSSSCG00000024498 | 347    |
| MSTRG. 4473  | ENSSSCG00000005380 | 0      |
| MSTRG. 44730 | ENSSSCG00000025812 | 22041  |
| MSTRG. 44754 | ENSSSCG00000023846 | 54303  |
| MSTRG. 44755 | ENSSSCG00000023846 | 38215  |
| MSTRG. 44764 | ENSSSCG00000023846 | 2711   |
| MSTRG. 44893 | ENSSSCG00000029301 | 9365   |

|              |                    |       |
|--------------|--------------------|-------|
| MSTRG. 44895 | ENSSSCG00000024438 | 18023 |
| MSTRG. 44905 | ENSSSCG00000029905 | 3873  |
| MSTRG. 4493  | ENSSSCG00000005387 | 69144 |
| MSTRG. 4494  | ENSSSCG00000005387 | 68738 |
| MSTRG. 44955 | ENSSSCG00000028518 | 2857  |
| MSTRG. 44975 | ENSSSCG00000026118 | 42478 |
| MSTRG. 44991 | ENSSSCG00000030234 | 53129 |
| MSTRG. 44992 | ENSSSCG00000030234 | 35845 |
| MSTRG. 44994 | ENSSSCG00000021674 | 99533 |
| MSTRG. 44998 | ENSSSCG00000021674 | 40363 |
| MSTRG. 45002 | ENSSSCG00000028099 | 56025 |
| MSTRG. 45055 | ENSSSCG00000020697 | 11861 |
| MSTRG. 45071 | ENSSSCG00000021314 | 30521 |
| MSTRG. 45089 | ENSSSCG00000028394 | 19687 |
| MSTRG. 45091 | ENSSSCG00000029691 | 4537  |
| MSTRG. 45155 | ENSSSCG00000021020 | 11427 |
| MSTRG. 45171 | ENSSSCG00000024540 | 72902 |
| MSTRG. 45212 | ENSSSCG00000009548 | 25202 |
| MSTRG. 45213 | ENSSSCG00000009548 | 33339 |
| MSTRG. 45215 | ENSSSCG00000026381 | 23556 |
| MSTRG. 45277 | ENSSSCG00000028395 | 17454 |
| MSTRG. 45325 | ENSSSCG00000026821 | 13310 |
| MSTRG. 45333 | ENSSSCG00000022237 | 14772 |
| MSTRG. 4534  | ENSSSCG00000005424 | 8758  |
| MSTRG. 45343 | ENSSSCG00000021190 | 9768  |
| MSTRG. 45360 | ENSSSCG00000020819 | 30548 |
| MSTRG. 45362 | ENSSSCG00000021019 | 6850  |
| MSTRG. 45368 | ENSSSCG00000029493 | 18993 |
| MSTRG. 45391 | ENSSSCG00000022714 | 11755 |
| MSTRG. 4542  | ENSSSCG00000005428 | 24344 |
| MSTRG. 45462 | ENSSSCG00000029245 | 20015 |
| MSTRG. 45471 | ENSSSCG00000021529 | 7645  |
| MSTRG. 45541 | ENSSSCG00000029045 | 3812  |
| MSTRG. 45566 | ENSSSCG00000023454 | 1084  |
| MSTRG. 4561  | ENSSSCG00000005436 | 46692 |
| MSTRG. 45624 | ENSSSCG00000027664 | 44074 |
| MSTRG. 4572  | ENSSSCG00000005443 | 73614 |
| MSTRG. 45726 | ENSSSCG00000017829 | 24073 |
| MSTRG. 45728 | ENSSSCG00000017829 | 17037 |
| MSTRG. 45805 | ENSSSCG00000021045 | 1176  |
| MSTRG. 45867 | ENSSSCG00000024931 | 1309  |
| MSTRG. 45871 | ENSSSCG00000026181 | 6962  |
| MSTRG. 4597  | ENSSSCG00000021386 | 6138  |
| MSTRG. 45992 | ENSSSCG00000026881 | 25109 |
| MSTRG. 45996 | ENSSSCG00000026881 | 7549  |
| MSTRG. 46069 | ENSSSCG00000029409 | 61971 |
| MSTRG. 46082 | ENSSSCG00000012064 | 34555 |

|              |                    |        |
|--------------|--------------------|--------|
| MSTRG. 46087 | ENSSSCG00000022879 | 9879   |
| MSTRG. 46091 | ENSSSCG00000029917 | 2660   |
| MSTRG. 4617  | ENSSSCG00000005465 | 136092 |
| MSTRG. 46201 | ENSSSCG00000028712 | 15824  |
| MSTRG. 4621  | ENSSSCG00000005466 | 63771  |
| MSTRG. 46210 | ENSSSCG00000021332 | 16575  |
| MSTRG. 46211 | ENSSSCG00000021332 | 431    |
| MSTRG. 4628  | ENSSSCG00000005472 | 14868  |
| MSTRG. 46344 | ENSSSCG00000027061 | 8706   |
| MSTRG. 46348 | ENSSSCG00000026063 | 27123  |
| MSTRG. 46356 | ENSSSCG00000021626 | 11738  |
| MSTRG. 46372 | ENSSSCG00000021837 | 7603   |
| MSTRG. 46495 | ENSSSCG00000030189 | 10768  |
| MSTRG. 46501 | ENSSSCG00000025089 | 14856  |
| MSTRG. 46504 | ENSSSCG00000028548 | 17137  |
| MSTRG. 46539 | ENSSSCG00000026092 | 34696  |
| MSTRG. 46576 | ENSSSCG00000026255 | 53829  |
| MSTRG. 46577 | ENSSSCG00000026255 | 54422  |
| MSTRG. 46580 | ENSSSCG00000028998 | 15329  |
| MSTRG. 46739 | ENSSSCG00000027273 | 6056   |
| MSTRG. 4678  | ENSSSCG00000005498 | 232348 |
| MSTRG. 46796 | ENSSSCG00000004921 | 56518  |
| MSTRG. 46806 | ENSSSCG00000004923 | 8174   |
| MSTRG. 46857 | ENSSSCG00000024910 | 12856  |
| MSTRG. 46871 | ENSSSCG00000030315 | 20595  |
| MSTRG. 46889 | ENSSSCG00000013477 | 8857   |
| MSTRG. 46934 | ENSSSCG00000023801 | 43315  |
| MSTRG. 46938 | ENSSSCG00000023801 | 36122  |
| MSTRG. 46952 | ENSSSCG00000023801 | 45843  |
| MSTRG. 47012 | ENSSSCG00000025698 | 6348   |
| MSTRG. 47016 | ENSSSCG00000021415 | 6884   |
| MSTRG. 47021 | ENSSSCG00000028000 | 13822  |
| MSTRG. 4703  | ENSSSCG00000005511 | 0      |
| MSTRG. 4706  | ENSSSCG00000029825 | 24329  |
| MSTRG. 47078 | ENSSSCG00000030046 | 29857  |
| MSTRG. 47093 | ENSSSCG00000030242 | 2722   |
| MSTRG. 47094 | ENSSSCG00000030242 | 10296  |
| MSTRG. 47107 | ENSSSCG00000029483 | 13500  |
| MSTRG. 4713  | ENSSSCG00000005514 | 84965  |
| MSTRG. 47144 | ENSSSCG00000026809 | 49150  |
| MSTRG. 47177 | ENSSSCG00000022284 | 3523   |
| MSTRG. 47209 | ENSSSCG00000025770 | 39529  |
| MSTRG. 47213 | ENSSSCG00000023037 | 41253  |
| MSTRG. 47277 | ENSSSCG00000027650 | 20105  |
| MSTRG. 4729  | ENSSSCG00000005574 | 10161  |
| MSTRG. 47292 | ENSSSCG00000023649 | 2696   |
| MSTRG. 47353 | ENSSSCG00000023608 | 15691  |

|              |                    |        |
|--------------|--------------------|--------|
| MSTRG. 47365 | ENSSSCG00000025627 | 24324  |
| MSTRG. 474   | ENSSSCG00000004133 | 64940  |
| MSTRG. 4744  | ENSSSCG00000005577 | 10928  |
| MSTRG. 4746  | ENSSSCG00000005577 | 21147  |
| MSTRG. 47466 | ENSSSCG00000020754 | 2958   |
| MSTRG. 47467 | ENSSSCG00000020754 | 5598   |
| MSTRG. 47490 | ENSSSCG00000029168 | 35483  |
| MSTRG. 47495 | ENSSSCG00000029168 | 34520  |
| MSTRG. 47562 | ENSSSCG00000028651 | 2452   |
| MSTRG. 47624 | ENSSSCG00000024946 | 13859  |
| MSTRG. 47633 | ENSSSCG00000003820 | 10548  |
| MSTRG. 47680 | ENSSSCG00000024489 | 135834 |
| MSTRG. 47714 | ENSSSCG00000022942 | 17570  |
| MSTRG. 4775  | ENSSSCG00000023197 | 38295  |
| MSTRG. 47751 | ENSSSCG00000020677 | 18480  |
| MSTRG. 47752 | ENSSSCG00000025262 | 13255  |
| MSTRG. 4776  | ENSSSCG00000023197 | 49541  |
| MSTRG. 4780  | ENSSSCG00000005583 | 37415  |
| MSTRG. 4781  | ENSSSCG00000005583 | 42501  |
| MSTRG. 47823 | ENSSSCG00000023673 | 2912   |
| MSTRG. 47963 | ENSSSCG00000029532 | 4904   |
| MSTRG. 4813  | ENSSSCG00000005586 | 287660 |
| MSTRG. 48137 | ENSSSCG00000027269 | 24177  |
| MSTRG. 48171 | ENSSSCG00000005285 | 152117 |
| MSTRG. 48173 | ENSSSCG00000005285 | 202267 |
| MSTRG. 48184 | ENSSSCG00000025652 | 25764  |
| MSTRG. 48226 | ENSSSCG00000022389 | 16078  |
| MSTRG. 48268 | ENSSSCG00000027982 | 1498   |
| MSTRG. 48272 | ENSSSCG00000025299 | 15686  |
| MSTRG. 48274 | ENSSSCG00000021661 | 4640   |
| MSTRG. 48276 | ENSSSCG00000027274 | 12825  |
| MSTRG. 48277 | ENSSSCG00000027274 | 8528   |
| MSTRG. 48287 | ENSSSCG00000026124 | 11906  |
| MSTRG. 48288 | ENSSSCG00000026124 | 5205   |
| MSTRG. 48304 | ENSSSCG00000021766 | 9765   |
| MSTRG. 48408 | ENSSSCG00000023369 | 3787   |
| MSTRG. 48419 | ENSSSCG00000022979 | 8036   |
| MSTRG. 48430 | ENSSSCG00000022125 | 10114  |
| MSTRG. 48432 | ENSSSCG00000022409 | 3524   |
| MSTRG. 48461 | ENSSSCG00000028892 | 9384   |
| MSTRG. 48512 | ENSSSCG00000022782 | 10918  |
| MSTRG. 48565 | ENSSSCG00000021717 | 10192  |
| MSTRG. 48566 | ENSSSCG00000021717 | 10972  |
| MSTRG. 48654 | ENSSSCG00000023869 | 3189   |
| MSTRG. 48665 | ENSSSCG00000029303 | 13510  |
| MSTRG. 48730 | ENSSSCG00000023053 | 4381   |
| MSTRG. 48763 | ENSSSCG00000021102 | 7968   |

|              |                    |        |
|--------------|--------------------|--------|
| MSTRG. 4877  | ENSSSCG00000005601 | 24427  |
| MSTRG. 48808 | ENSSSCG00000024532 | 12407  |
| MSTRG. 48847 | ENSSSCG00000029900 | 10409  |
| MSTRG. 48854 | ENSSSCG00000022737 | 2865   |
| MSTRG. 48860 | ENSSSCG00000022778 | 29419  |
| MSTRG. 48861 | ENSSSCG00000022778 | 29628  |
| MSTRG. 4887  | ENSSSCG00000029169 | 68125  |
| MSTRG. 48873 | ENSSSCG00000022190 | 16776  |
| MSTRG. 48884 | ENSSSCG00000022732 | 10377  |
| MSTRG. 48892 | ENSSSCG00000024368 | 11992  |
| MSTRG. 48917 | ENSSSCG00000027757 | 3103   |
| MSTRG. 49051 | ENSSSCG00000023658 | 1858   |
| MSTRG. 49054 | ENSSSCG00000027971 | 6961   |
| MSTRG. 49065 | ENSSSCG00000022753 | 10109  |
| MSTRG. 49090 | ENSSSCG00000021395 | 4615   |
| MSTRG. 49091 | ENSSSCG00000021395 | 0      |
| MSTRG. 49094 | ENSSSCG00000025741 | 7700   |
| MSTRG. 49098 | ENSSSCG00000029006 | 7255   |
| MSTRG. 49103 | ENSSSCG00000021541 | 19740  |
| MSTRG. 49108 | ENSSSCG00000021006 | 1857   |
| MSTRG. 49109 | ENSSSCG00000028785 | 8693   |
| MSTRG. 49132 | ENSSSCG00000023114 | 855    |
| MSTRG. 49150 | ENSSSCG00000028232 | 1349   |
| MSTRG. 49163 | ENSSSCG00000021642 | 9964   |
| MSTRG. 49168 | ENSSSCG00000025653 | 47590  |
| MSTRG. 49169 | ENSSSCG00000025653 | 45121  |
| MSTRG. 49252 | ENSSSCG00000030139 | 4805   |
| MSTRG. 49307 | ENSSSCG00000029490 | 1297   |
| MSTRG. 49313 | ENSSSCG00000027357 | 1657   |
| MSTRG. 49339 | ENSSSCG00000023292 | 11143  |
| MSTRG. 4937  | ENSSSCG00000005608 | 149160 |
| MSTRG. 4938  | ENSSSCG00000005608 | 46767  |
| MSTRG. 49437 | ENSSSCG00000029880 | 7928   |
| MSTRG. 49479 | ENSSSCG00000011619 | 80244  |
| MSTRG. 49578 | ENSSSCG00000022133 | 8126   |
| MSTRG. 49585 | ENSSSCG00000023688 | 12184  |
| MSTRG. 49600 | ENSSSCG00000022790 | 55589  |
| MSTRG. 49612 | ENSSSCG00000029652 | 15996  |
| MSTRG. 49613 | ENSSSCG00000029652 | 18927  |
| MSTRG. 49633 | ENSSSCG00000016178 | 13470  |
| MSTRG. 49634 | ENSSSCG00000026123 | 22406  |
| MSTRG. 49681 | ENSSSCG00000011117 | 24788  |
| MSTRG. 4971  | ENSSSCG00000005630 | 6039   |
| MSTRG. 49752 | ENSSSCG00000022093 | 168196 |
| MSTRG. 4976  | ENSSSCG00000022655 | 3753   |
| MSTRG. 49792 | ENSSSCG00000021708 | 17347  |
| MSTRG. 49795 | ENSSSCG00000021708 | 9885   |

|              |                    |        |
|--------------|--------------------|--------|
| MSTRG. 49814 | ENSSSCG00000023901 | 14971  |
| MSTRG. 49876 | ENSSSCG00000009388 | 11452  |
| MSTRG. 49880 | ENSSSCG00000009388 | 30002  |
| MSTRG. 49886 | ENSSSCG00000009388 | 5431   |
| MSTRG. 49913 | ENSSSCG00000028222 | 67631  |
| MSTRG. 50032 | ENSSSCG00000027756 | 51190  |
| MSTRG. 50039 | ENSSSCG00000026356 | 17956  |
| MSTRG. 50042 | ENSSSCG00000021437 | 16701  |
| MSTRG. 50045 | ENSSSCG00000016058 | 5177   |
| MSTRG. 50068 | ENSSSCG00000024855 | 44513  |
| MSTRG. 50081 | ENSSSCG00000021515 | 97787  |
| MSTRG. 50088 | ENSSSCG00000024892 | 20337  |
| MSTRG. 50089 | ENSSSCG00000024892 | 20321  |
| MSTRG. 50090 | ENSSSCG00000024892 | 18195  |
| MSTRG. 50114 | ENSSSCG00000009985 | 27314  |
| MSTRG. 5013  | ENSSSCG00000005678 | 93826  |
| MSTRG. 50138 | ENSSSCG00000026021 | 101486 |
| MSTRG. 50143 | ENSSSCG00000021433 | 5633   |
| MSTRG. 50164 | ENSSSCG00000022831 | 19859  |
| MSTRG. 50176 | ENSSSCG00000007895 | 28112  |
| MSTRG. 50211 | ENSSSCG00000025611 | 16683  |
| MSTRG. 50217 | ENSSSCG00000025697 | 7270   |
| MSTRG. 50298 | ENSSSCG00000021263 | 3758   |
| MSTRG. 50326 | ENSSSCG00000018065 | 3756   |
| MSTRG. 50328 | ENSSSCG00000018065 | 2673   |
| MSTRG. 50330 | ENSSSCG00000018065 | 1034   |
| MSTRG. 50350 | ENSSSCG00000018087 | 1447   |
| MSTRG. 50366 | ENSSSCG00000023172 | 18342  |
| MSTRG. 50367 | ENSSSCG00000023172 | 23264  |
| MSTRG. 50379 | ENSSSCG00000012102 | 440587 |
| MSTRG. 50387 | ENSSSCG00000012109 | 200102 |
| MSTRG. 5040  | ENSSSCG00000005702 | 40877  |
| MSTRG. 50404 | ENSSSCG00000012123 | 0      |
| MSTRG. 50455 | ENSSSCG00000012144 | 39650  |
| MSTRG. 50556 | ENSSSCG00000030735 | 55416  |
| MSTRG. 50597 | ENSSSCG00000025331 | 52147  |
| MSTRG. 50602 | ENSSSCG00000028908 | 43735  |
| MSTRG. 5061  | ENSSSCG00000005732 | 17846  |
| MSTRG. 50622 | ENSSSCG00000012241 | 123677 |
| MSTRG. 50650 | ENSSSCG00000012258 | 9128   |
| MSTRG. 50666 | ENSSSCG00000026984 | 538218 |
| MSTRG. 50678 | ENSSSCG00000026984 | 571403 |
| MSTRG. 50679 | ENSSSCG00000012264 | 583033 |
| MSTRG. 50684 | ENSSSCG00000012266 | 74902  |
| MSTRG. 5070  | ENSSSCG00000005735 | 5353   |
| MSTRG. 50744 | ENSSSCG00000028964 | 17778  |
| MSTRG. 50768 | ENSSSCG00000012305 | 59041  |

|              |                    |        |
|--------------|--------------------|--------|
| MSTRG. 5078  | ENSSSCG00000005749 | 21671  |
| MSTRG. 50782 | ENSSSCG00000024958 | 221492 |
| MSTRG. 50783 | ENSSSCG00000024958 | 94533  |
| MSTRG. 50785 | ENSSSCG00000024958 | 83961  |
| MSTRG. 50789 | ENSSSCG00000024958 | 43834  |
| MSTRG. 5079  | ENSSSCG00000024912 | 20184  |
| MSTRG. 50822 | ENSSSCG00000012353 | 72375  |
| MSTRG. 5097  | ENSSSCG00000025387 | 9      |
| MSTRG. 50977 | ENSSSCG00000012416 | 101060 |
| MSTRG. 50978 | ENSSSCG00000012416 | 169163 |
| MSTRG. 51011 | ENSSSCG00000029458 | 283573 |
| MSTRG. 51014 | ENSSSCG00000029458 | 375587 |
| MSTRG. 51058 | ENSSSCG00000012433 | 45889  |
| MSTRG. 5109  | ENSSSCG00000005776 | 11923  |
| MSTRG. 51112 | ENSSSCG00000023546 | 0      |
| MSTRG. 51114 | ENSSSCG00000023546 | 61372  |
| MSTRG. 51118 | ENSSSCG00000024291 | 24230  |
| MSTRG. 5115  | ENSSSCG00000027727 | 16279  |
| MSTRG. 51173 | ENSSSCG00000027012 | 23313  |
| MSTRG. 51273 | ENSSSCG00000012541 | 29884  |
| MSTRG. 5129  | ENSSSCG00000024959 | 15716  |
| MSTRG. 51295 | ENSSSCG00000012565 | 29297  |
| MSTRG. 51302 | ENSSSCG00000012565 | 12262  |
| MSTRG. 51313 | ENSSSCG00000012572 | 22337  |
| MSTRG. 51355 | ENSSSCG00000012598 | 133958 |
| MSTRG. 51361 | ENSSSCG00000012602 | 3946   |
| MSTRG. 5142  | ENSSSCG00000005837 | 4234   |
| MSTRG. 51439 | ENSSSCG00000012640 | 24152  |
| MSTRG. 51473 | ENSSSCG00000012656 | 36194  |
| MSTRG. 51501 | ENSSSCG00000021205 | 20380  |
| MSTRG. 51519 | ENSSSCG00000012676 | 88954  |
| MSTRG. 51532 | ENSSSCG00000031011 | 52154  |
| MSTRG. 51544 | ENSSSCG00000026763 | 14435  |
| MSTRG. 51551 | ENSSSCG00000023622 | 1807   |
| MSTRG. 51570 | ENSSSCG00000012703 | 6287   |
| MSTRG. 51579 | ENSSSCG00000012713 | 155182 |
| MSTRG. 51619 | ENSSSCG00000012729 | 0      |
| MSTRG. 51623 | ENSSSCG00000012730 | 462660 |
| MSTRG. 51657 | ENSSSCG00000012771 | 20975  |
| MSTRG. 51666 | ENSSSCG00000012791 | 7423   |
| MSTRG. 51678 | ENSSSCG00000012808 | 0      |
| MSTRG. 5168  | ENSSSCG00000023543 | 20203  |
| MSTRG. 5169  | ENSSSCG00000023543 | 0      |
| MSTRG. 5170  | ENSSSCG00000005862 | 52720  |
| MSTRG. 51705 | ENSSSCG00000028934 | 13557  |
| MSTRG. 51714 | ENSSSCG00000030421 | 9125   |
| MSTRG. 5207  | ENSSSCG00000010800 | 35300  |

|             |                    |        |
|-------------|--------------------|--------|
| MSTRG. 5217 | ENSSSCG00000022427 | 49116  |
| MSTRG. 5218 | ENSSSCG00000022427 | 31253  |
| MSTRG. 5222 | ENSSSCG00000024704 | 294782 |
| MSTRG. 525  | ENSSSCG00000004137 | 0      |
| MSTRG. 5266 | ENSSSCG00000029417 | 40157  |
| MSTRG. 5286 | ENSSSCG00000010822 | 19989  |
| MSTRG. 5294 | ENSSSCG00000027748 | 35792  |
| MSTRG. 5309 | ENSSSCG00000010832 | 21307  |
| MSTRG. 533  | ENSSSCG00000004137 | 127883 |
| MSTRG. 5338 | ENSSSCG00000010837 | 34815  |
| MSTRG. 5339 | ENSSSCG00000010836 | 53658  |
| MSTRG. 5407 | ENSSSCG00000028178 | 26454  |
| MSTRG. 5430 | ENSSSCG00000025290 | 16998  |
| MSTRG. 5438 | ENSSSCG00000027103 | 27818  |
| MSTRG. 5503 | ENSSSCG00000010860 | 10600  |
| MSTRG. 5516 | ENSSSCG00000010865 | 62198  |
| MSTRG. 5517 | ENSSSCG00000010865 | 40117  |
| MSTRG. 5548 | ENSSSCG00000010876 | 45946  |
| MSTRG. 5557 | ENSSSCG00000010877 | 24394  |
| MSTRG. 5560 | ENSSSCG00000010877 | 52691  |
| MSTRG. 5561 | ENSSSCG00000010877 | 60327  |
| MSTRG. 5601 | ENSSSCG00000010880 | 267958 |
| MSTRG. 5656 | ENSSSCG00000010884 | 101547 |
| MSTRG. 5659 | ENSSSCG00000010884 | 101519 |
| MSTRG. 567  | ENSSSCG00000004139 | 116698 |
| MSTRG. 5719 | ENSSSCG00000010885 | 21474  |
| MSTRG. 5720 | ENSSSCG00000010885 | 8761   |
| MSTRG. 5724 | ENSSSCG00000022143 | 135304 |
| MSTRG. 5734 | ENSSSCG00000029535 | 0      |
| MSTRG. 5756 | ENSSSCG00000010897 | 15441  |
| MSTRG. 5802 | ENSSSCG00000010900 | 107189 |
| MSTRG. 5824 | ENSSSCG00000010907 | 32026  |
| MSTRG. 5833 | ENSSSCG00000010908 | 176768 |
| MSTRG. 5843 | ENSSSCG00000010911 | 2818   |
| MSTRG. 5860 | ENSSSCG00000027928 | 67336  |
| MSTRG. 5876 | ENSSSCG00000010926 | 29317  |
| MSTRG. 5877 | ENSSSCG00000010926 | 41570  |
| MSTRG. 591  | ENSSSCG00000004144 | 20276  |
| MSTRG. 5919 | ENSSSCG00000027312 | 69823  |
| MSTRG. 5931 | ENSSSCG00000023464 | 7049   |
| MSTRG. 5932 | ENSSSCG00000023464 | 8589   |
| MSTRG. 5934 | ENSSSCG00000024719 | 23467  |
| MSTRG. 5996 | ENSSSCG00000010957 | 150884 |
| MSTRG. 6056 | ENSSSCG00000010981 | 695    |
| MSTRG. 6178 | ENSSSCG00000011018 | 26687  |
| MSTRG. 6207 | ENSSSCG00000011022 | 216919 |
| MSTRG. 6277 | ENSSSCG00000023200 | 16271  |

|             |                    |        |
|-------------|--------------------|--------|
| MSTRG. 6316 | ENSSSCG00000011040 | 53857  |
| MSTRG. 6358 | ENSSSCG00000011055 | 49722  |
| MSTRG. 6381 | ENSSSCG00000026354 | 62495  |
| MSTRG. 6393 | ENSSSCG00000028655 | 34777  |
| MSTRG. 6438 | ENSSSCG00000024127 | 41045  |
| MSTRG. 6442 | ENSSSCG00000028135 | 64869  |
| MSTRG. 6446 | ENSSSCG00000011074 | 103027 |
| MSTRG. 6448 | ENSSSCG00000011075 | 155464 |
| MSTRG. 645  | ENSSSCG00000004161 | 66567  |
| MSTRG. 6541 | ENSSSCG00000011102 | 198226 |
| MSTRG. 663  | ENSSSCG00000004161 | 156356 |
| MSTRG. 6670 | ENSSSCG00000011120 | 174354 |
| MSTRG. 6674 | ENSSSCG00000011119 | 124758 |
| MSTRG. 6678 | ENSSSCG00000011120 | 64109  |
| MSTRG. 6682 | ENSSSCG00000011121 | 39291  |
| MSTRG. 6688 | ENSSSCG00000011121 | 220621 |
| MSTRG. 6738 | ENSSSCG00000030030 | 27373  |
| MSTRG. 6744 | ENSSSCG00000011145 | 34929  |
| MSTRG. 6746 | ENSSSCG00000011145 | 53515  |
| MSTRG. 6792 | ENSSSCG00000011160 | 538461 |
| MSTRG. 6800 | ENSSSCG00000029066 | 9021   |
| MSTRG. 6814 | ENSSSCG00000011165 | 59647  |
| MSTRG. 6816 | ENSSSCG00000011166 | 144207 |
| MSTRG. 6838 | ENSSSCG00000009276 | 56919  |
| MSTRG. 6890 | ENSSSCG00000022678 | 5376   |
| MSTRG. 6906 | ENSSSCG00000009302 | 47504  |
| MSTRG. 6932 | ENSSSCG00000023944 | 9245   |
| MSTRG. 6936 | ENSSSCG00000009317 | 51348  |
| MSTRG. 6961 | ENSSSCG00000009326 | 98594  |
| MSTRG. 6962 | ENSSSCG00000009326 | 88994  |
| MSTRG. 6967 | ENSSSCG00000009326 | 53806  |
| MSTRG. 6975 | ENSSSCG00000009326 | 49993  |
| MSTRG. 6979 | ENSSSCG00000009326 | 104771 |
| MSTRG. 6980 | ENSSSCG00000009328 | 105255 |
| MSTRG. 6993 | ENSSSCG00000009330 | 74026  |
| MSTRG. 7002 | ENSSSCG00000023699 | 26440  |
| MSTRG. 7103 | ENSSSCG00000026613 | 1501   |
| MSTRG. 7109 | ENSSSCG00000009359 | 14242  |
| MSTRG. 7181 | ENSSSCG00000009369 | 250183 |
| MSTRG. 7183 | ENSSSCG00000009370 | 376688 |
| MSTRG. 7205 | ENSSSCG00000009378 | 18900  |
| MSTRG. 7219 | ENSSSCG00000009383 | 100823 |
| MSTRG. 7255 | ENSSSCG00000022623 | 55688  |
| MSTRG. 7257 | ENSSSCG00000022064 | 24128  |
| MSTRG. 7311 | ENSSSCG00000009405 | 53484  |
| MSTRG. 7327 | ENSSSCG00000025938 | 4354   |
| MSTRG. 7332 | ENSSSCG00000022868 | 34583  |

|             |                    |        |
|-------------|--------------------|--------|
| MSTRG. 7381 | ENSSSCG00000009440 | 63551  |
| MSTRG. 7425 | ENSSSCG00000009449 | 180192 |
| MSTRG. 7493 | ENSSSCG00000009462 | 736815 |
| MSTRG. 7519 | ENSSSCG00000009462 | 944736 |
| MSTRG. 7561 | ENSSSCG00000009474 | 179596 |
| MSTRG. 7606 | ENSSSCG00000026284 | 0      |
| MSTRG. 7608 | ENSSSCG00000009496 | 0      |
| MSTRG. 7609 | ENSSSCG00000009498 | 10613  |
| MSTRG. 7612 | ENSSSCG00000026286 | 0      |
| MSTRG. 7618 | ENSSSCG00000026286 | 0      |
| MSTRG. 7619 | ENSSSCG00000026286 | 0      |
| MSTRG. 7620 | ENSSSCG00000026284 | 0      |
| MSTRG. 7621 | ENSSSCG00000026286 | 0      |
| MSTRG. 7630 | ENSSSCG00000026286 | 0      |
| MSTRG. 7634 | ENSSSCG00000026284 | 0      |
| MSTRG. 7635 | ENSSSCG00000026284 | 0      |
| MSTRG. 7638 | ENSSSCG00000026284 | 0      |
| MSTRG. 7645 | ENSSSCG00000009499 | 49229  |
| MSTRG. 7647 | ENSSSCG00000027851 | 33804  |
| MSTRG. 7656 | ENSSSCG00000009505 | 127448 |
| MSTRG. 766  | ENSSSCG00000004204 | 149698 |
| MSTRG. 7697 | ENSSSCG00000009517 | 11361  |
| MSTRG. 7708 | ENSSSCG00000029996 | 8152   |
| MSTRG. 7766 | ENSSSCG00000009529 | 32916  |
| MSTRG. 7771 | ENSSSCG00000009531 | 3330   |
| MSTRG. 779  | ENSSSCG00000024392 | 484091 |
| MSTRG. 7790 | ENSSSCG00000009536 | 174055 |
| MSTRG. 7791 | ENSSSCG00000009540 | 3089   |
| MSTRG. 7793 | ENSSSCG00000009540 | 9133   |
| MSTRG. 7795 | ENSSSCG00000009542 | 31596  |
| MSTRG. 7796 | ENSSSCG00000009542 | 31066  |
| MSTRG. 7801 | ENSSSCG00000009544 | 449685 |
| MSTRG. 7819 | ENSSSCG00000029424 | 108106 |
| MSTRG. 7846 | ENSSSCG00000009569 | 0      |
| MSTRG. 7853 | ENSSSCG00000009574 | 5663   |
| MSTRG. 7868 | ENSSSCG00000017126 | 35981  |
| MSTRG. 7878 | ENSSSCG00000017137 | 132237 |
| MSTRG. 7903 | ENSSSCG00000028593 | 10123  |
| MSTRG. 7932 | ENSSSCG00000022843 | 21616  |
| MSTRG. 7933 | ENSSSCG00000022843 | 11578  |
| MSTRG. 7936 | ENSSSCG00000017160 | 49187  |
| MSTRG. 7948 | ENSSSCG00000017167 | 229935 |
| MSTRG. 7952 | ENSSSCG00000017168 | 149612 |
| MSTRG. 7959 | ENSSSCG00000022373 | 28142  |
| MSTRG. 7960 | ENSSSCG00000017172 | 6541   |
| MSTRG. 7998 | ENSSSCG00000021627 | 29242  |
| MSTRG. 8014 | ENSSSCG00000028210 | 3743   |

|             |                    |        |
|-------------|--------------------|--------|
| MSTRG. 8038 | ENSSSCG00000017246 | 28333  |
| MSTRG. 8059 | ENSSSCG00000017251 | 212667 |
| MSTRG. 8098 | ENSSSCG00000017263 | 44978  |
| MSTRG. 8099 | ENSSSCG00000017263 | 51988  |
| MSTRG. 8100 | ENSSSCG00000017263 | 69044  |
| MSTRG. 8104 | ENSSSCG00000030997 | 103698 |
| MSTRG. 8105 | ENSSSCG00000030997 | 158058 |
| MSTRG. 8106 | ENSSSCG00000017268 | 169850 |
| MSTRG. 8108 | ENSSSCG00000017269 | 65395  |
| MSTRG. 8110 | ENSSSCG00000017269 | 84011  |
| MSTRG. 8137 | ENSSSCG00000017273 | 40010  |
| MSTRG. 8144 | ENSSSCG00000017277 | 58254  |
| MSTRG. 8148 | ENSSSCG00000017278 | 61998  |
| MSTRG. 8158 | ENSSSCG00000017279 | 41813  |
| MSTRG. 8186 | ENSSSCG00000017297 | 13185  |
| MSTRG. 8193 | ENSSSCG00000017299 | 37874  |
| MSTRG. 8208 | ENSSSCG00000017308 | 60662  |
| MSTRG. 8226 | ENSSSCG00000017322 | 33961  |
| MSTRG. 8293 | ENSSSCG00000022837 | 14501  |
| MSTRG. 8309 | ENSSSCG00000017371 | 3454   |
| MSTRG. 8385 | ENSSSCG00000017476 | 23237  |
| MSTRG. 8416 | ENSSSCG00000017502 | 26546  |
| MSTRG. 8445 | ENSSSCG00000024743 | 4640   |
| MSTRG. 8456 | ENSSSCG00000017526 | 8142   |
| MSTRG. 8517 | ENSSSCG00000017536 | 19828  |
| MSTRG. 8533 | ENSSSCG00000017546 | 22218  |
| MSTRG. 8566 | ENSSSCG00000028962 | 26212  |
| MSTRG. 8586 | ENSSSCG00000017593 | 39087  |
| MSTRG. 8629 | ENSSSCG00000017614 | 7059   |
| MSTRG. 8641 | ENSSSCG00000029475 | 152554 |
| MSTRG. 8867 | ENSSSCG00000017693 | 103416 |
| MSTRG. 8870 | ENSSSCG00000017696 | 0      |
| MSTRG. 8906 | ENSSSCG00000017713 | 2947   |
| MSTRG. 8928 | ENSSSCG00000017722 | 2653   |
| MSTRG. 8934 | ENSSSCG00000017727 | 60220  |
| MSTRG. 8979 | ENSSSCG00000017744 | 46835  |
| MSTRG. 8983 | ENSSSCG00000017747 | 109130 |
| MSTRG. 9047 | ENSSSCG00000017754 | 31044  |
| MSTRG. 9055 | ENSSSCG00000017755 | 162637 |
| MSTRG. 9100 | ENSSSCG00000017763 | 11291  |
| MSTRG. 9313 | ENSSSCG00000017811 | 4808   |
| MSTRG. 9329 | ENSSSCG00000017822 | 38357  |
| MSTRG. 9348 | ENSSSCG00000017832 | 96542  |
| MSTRG. 9391 | ENSSSCG00000017870 | 36794  |
| MSTRG. 9477 | ENSSSCG00000017912 | 17442  |
| MSTRG. 9508 | ENSSSCG00000017926 | 3532   |
| MSTRG. 9537 | ENSSSCG00000027897 | 3731   |

|             |                    |        |
|-------------|--------------------|--------|
| MSTRG. 9566 | ENSSSCG00000023166 | 2493   |
| MSTRG. 9572 | ENSSSCG00000028924 | 11439  |
| MSTRG. 9581 | ENSSSCG00000017985 | 0      |
| MSTRG. 9614 | ENSSSCG00000018009 | 10527  |
| MSTRG. 9615 | ENSSSCG00000018009 | 11523  |
| MSTRG. 9640 | ENSSSCG00000025046 | 73295  |
| MSTRG. 9653 | ENSSSCG00000018027 | 16069  |
| MSTRG. 9664 | ENSSSCG00000021252 | 30544  |
| MSTRG. 9665 | ENSSSCG00000018032 | 16270  |
| MSTRG. 9669 | ENSSSCG00000018033 | 5570   |
| MSTRG. 97   | ENSSSCG00000024876 | 77913  |
| MSTRG. 9737 | ENSSSCG00000026677 | 23276  |
| MSTRG. 9746 | ENSSSCG00000011192 | 0      |
| MSTRG. 9750 | ENSSSCG00000020687 | 3032   |
| MSTRG. 9785 | ENSSSCG00000011196 | 2995   |
| MSTRG. 9821 | ENSSSCG00000011198 | 146538 |
| MSTRG. 9980 | ENSSSCG00000029952 | 49514  |
| MSTRG. 9981 | ENSSSCG00000029952 | 56187  |
| MSTRG. 9990 | ENSSSCG00000026488 | 69182  |
